# Supplementary material for: Efficient prediction of reaction paths through molecular graph and reaction network analysis
Source: PubMed Central journal article supplement (PMC5887236; doi:10.1039/c7sc03628k), 2017-12-12
Supplement: SC-009-C7SC03628K-s001.pdf [file SC-009-C7SC03628K-s001.pdf]

**[Electronic Supplementary Information]**

**Efficient prediction of reaction paths through molecular graph and  
reaction network analysis**

Yeonjoon Kim, Jin Woo Kim, Zeehyo Kim, and Woo Youn Kim\*

Department of Chemistry, KAIST, 291 Daehak-ro, Yuseong-gu, Daejeon 34141, Korea

\*E-mail: wooyoun@kaist.ac.kr (WYK)

# 1. Detailed information on reaction networks and pathways for two example reactions

## 1.1. Claisen ester condensation.

**Table S1.** Information on the vertices of the reaction network obtained in Step 3 for the Claisen ester condensation.

| Vertex name    | SMILES                                                                                            | Included in the extracted minimal network? |
|----------------|---------------------------------------------------------------------------------------------------|--------------------------------------------|
| R              | <chem>[C]([CH2][CH3])([O][CH2][CH3])=[O].[C]([CH2][CH3])([O][CH2][CH3])=[O].[O-][CH2][CH3]</chem> | Yes                                        |
| P              | <chem>[C]([CH2][CH3])([CH]([CH3])[C]([O][CH2][CH3])=[O])=[O].[O-][CH2][CH3].[OH][CH2][CH3]</chem> | Yes                                        |
| I <sub>1</sub> | <chem>[C]([CH-][CH3])([O][CH2][CH3])=[O].[C]([CH2][CH3])([O][CH2][CH3])=[O].[OH][CH2][CH3]</chem> | Yes                                        |
| I <sub>2</sub> | <chem>[C]([CH]([C]([CH2][CH3])([O][CH2][CH3])[O-])[CH3])([O][CH2][CH3])=[O].[OH][CH2][CH3]</chem> | Yes                                        |
| 1              | <chem>[C]([CH2][CH3])([O][CH2][CH3])=[O].[C]([CH2][CH3])([O][CH2][CH3])([O][CH2][CH3])[O-]</chem> | Yes                                        |
| 2              | <chem>[C-]([O][CH2][CH3])=[O].[CH2]([O][CH2][CH3])[CH3].[C]([CH2][CH3])([O][CH2][CH3])=[O]</chem> | Yes                                        |
| 5              | <chem>[CH]([CH]([O][CH2][CH3])[CH3])([O][CH2][CH3])[O-].[C]([CH2][CH3])([O][CH2][CH3])=[O]</chem> | Yes                                        |
| 16             | <chem>[C]([CH2][CH3])([O][CH2][CH3])([O][CH2][CH3])[O-].[C](=[CH][CH3])=[O].[OH][CH2][CH3]</chem> | Yes                                        |
| 19             | <chem>[C]([CH2][CH3])([CH]([CH3])[C]([O][CH2][CH3])([O][CH2][CH3])[O-])=[O].[OH][CH2][CH3]</chem> | Yes                                        |
| 26             | <chem>[C-]([CH]([CH3])[C]([O][CH2][CH3])=[O])=[O].[CH2]([O][CH2][CH3])[CH3].[OH][CH2][CH3]</chem> | Yes                                        |
| 30             | <chem>[C-]([O][CH2][CH3])=[O].[CH]([C]([CH2][CH3])=[O])([O][CH2][CH3])[CH3].[OH][CH2][CH3]</chem> | Yes                                        |
| 50             | <chem>[C]([CH]([CH2][CH3])[CH3])([O][CH2][CH3])=[O].[OH][CH2][CH3].[C-]([O][CH2][CH3])=[O]</chem> | Yes                                        |
| 51             | <chem>[C]([CH]([O][CH2][CH3])[CH3])([O][CH2][CH3])([C]([CH2][CH3])=[O])[O-].[OH][CH2][CH3]</chem> | Yes                                        |
| 56             | <chem>[C]([CH-][CH3])([CH]([CH3])[C]([O][CH2][CH3])=[O])=[O].[OH][CH2][CH3].[OH][CH2][CH3]</chem> | Yes                                        |
| 4              | <chem>[C]([O][CH2][CH3])([C]([CH2][CH3])([O][CH2][CH3])[O-])=[O].[CH2]([O][CH2][CH3])[CH3]</chem> | No                                         |
| 10             | <chem>[CH]([O][CH2][CH3])=[O].[CH2]([CH]([CH3])[C]([O][CH2][CH3])=[O])[CH3].[O-][CH2][CH3]</chem> | No                                         |
| 13             | <chem>[CH]([CH]([O][CH2][CH3])[CH3])=[O].[C]([CH2][CH3])([O][CH2][CH3])=[O].[O-][CH2][CH3]</chem> | No                                         |
| 22             | <chem>[CH]([C]([CH2][CH3])([O][CH2][CH3])[O-])([O][CH2][CH3])[CH3].[CH]([O][CH2][CH3])=[O]</chem> | No                                         |
| 23             | <chem>[CH]([O][CH2][CH3])=[O].[CH2]([O][CH2][CH3])[CH3].[C]([CH-][CH3])([O][CH2][CH3])=[O]</chem> | No                                         |
| 24             | <chem>[C]([O][CH2][CH3])([CH]([CH3])[CH]([O][CH2][CH3])[O-])=[O].[CH2]([O][CH2][CH3])[CH3]</chem> | No                                         |
| 32             | <chem>[C]([O][CH2][CH3])([C](=[CH][CH3])[O-])=[O].[CH2]([O][CH2][CH3])[CH3]</chem>                | No                                         |

|    |                                                                                      |    |
|----|--------------------------------------------------------------------------------------|----|
|    | CH3].[OH][CH2][CH3]                                                                  |    |
| 36 | [C]([O][CH2][CH3])([C]([CH]([CH3])[CH2][CH3])([O][CH2][CH3])[O-])=[O].[OH][CH2][CH3] | No |
| 40 | [C]([O][CH2][CH3])([C]([CH]([CH3])[CH2][CH3])=[O])=[O].[O-][CH2][CH3].[OH][CH2][CH3] | No |
| 46 | [C]([O][CH2][CH3])([C]([O-])([CH2][CH3])[CH]([O][CH2][CH3])[CH3])=[O].[OH][CH2][CH3] | No |
| 49 | [C]([CH]([O][CH2][CH3])[CH3])([C]([CH2][CH3])([O][CH2][CH3])[O-])=[O].[OH][CH2][CH3] | No |
| 52 | [C]([CH]([CH]([CH3])[CH]([O][CH2][CH3])[O-])[CH3])([O][CH2][CH3])=[O].[OH][CH2][CH3] | No |
| 55 | [C](=[CH][CH3])=[O].[O]([CH]([CH3])[CH]([O][CH2][CH3])[O-])[CH2][CH3].[OH][CH2][CH3] | No |
| 57 | [CH]([CH]([CH]([CH3])[C]([O][CH2][CH3])=[O])[CH3])=[O].[O-][CH2][CH3].[OH][CH2][CH3] | No |
| 58 | [CH]([CH]([O][CH2][CH3])[CH3])=[O].[C]([CH-][CH3])([O][CH2][CH3])=[O].[OH][CH2][CH3] | No |
| 60 | [C]([CH]([CH]([CH]([O][CH2][CH3])[CH3])[O-])[CH3])([O][CH2][CH3])=[O].[OH][CH2][CH3] | No |
| 61 | [CH]([CH]([C]([CH]([O][CH2][CH3])[CH3])=[O])[CH3])([O][CH2][CH3])[O-].[OH][CH2][CH3] | No |
| 62 | [CH]([O][CH2][CH3])=[O].[CH]([C]([CH2][CH3])=[O])([O][CH2][CH3])[CH3].[O-][CH2][CH3] | No |

**Table S2.** Information on the edges of the reaction network obtained in Step 3 for the Claisen ester condensation.

| Source         | Target         | Chemical distance | Included in the extracted minimal network? |
|----------------|----------------|-------------------|--------------------------------------------|
| R              | 1              | 1                 | Yes                                        |
| R              | 2              | 2                 | Yes                                        |
| R              | I <sub>1</sub> | 2                 | Yes                                        |
| R              | I <sub>2</sub> | 3                 | Yes                                        |
| R              | 5              | 3                 | Yes                                        |
| I <sub>1</sub> | P              | 2                 | Yes                                        |
| I <sub>2</sub> | P              | 1                 | Yes                                        |
| 16             | P              | 4                 | Yes                                        |
| 19             | P              | 1                 | Yes                                        |
| 26             | P              | 2                 | Yes                                        |
| 30             | P              | 2                 | Yes                                        |
| 50             | P              | 4                 | Yes                                        |
| 51             | P              | 3                 | Yes                                        |
| 56             | P              | 2                 | Yes                                        |
| 1              | I <sub>1</sub> | 3                 | Yes                                        |
| 1              | I <sub>2</sub> | 4                 | Yes                                        |
| 1              | 19             | 4                 | Yes                                        |
| 2              | I <sub>1</sub> | 4                 | Yes                                        |

|                |                |   |     |
|----------------|----------------|---|-----|
| 2              | 26             | 4 | Yes |
| 2              | 30             | 4 | Yes |
| I <sub>1</sub> | I <sub>2</sub> | 1 | Yes |
| 5              | I <sub>1</sub> | 3 | Yes |
| I <sub>1</sub> | 16             | 2 | Yes |
| I <sub>1</sub> | 19             | 3 | Yes |
| I <sub>1</sub> | 30             | 4 | Yes |
| I <sub>1</sub> | 50             | 2 | Yes |
| I <sub>1</sub> | 51             | 3 | Yes |
| I <sub>1</sub> | 56             | 4 | Yes |
| 5              | I <sub>2</sub> | 4 | Yes |
| 16             | I <sub>2</sub> | 3 | Yes |
| I <sub>2</sub> | 19             | 2 | Yes |
| I <sub>2</sub> | 30             | 3 | Yes |
| 50             | I <sub>2</sub> | 3 | Yes |
| I <sub>2</sub> | 56             | 3 | Yes |
| 16             | 19             | 3 | Yes |
| 2              | R              | 2 | No  |
| R              | 4              | 3 | No  |
| 4              | R              | 3 | No  |
| I <sub>1</sub> | R              | 2 | No  |
| I <sub>2</sub> | R              | 3 | No  |
| 5              | R              | 3 | No  |
| P              | I <sub>1</sub> | 2 | No  |
| P              | I <sub>2</sub> | 1 | No  |
| P              | 16             | 4 | No  |
| P              | 19             | 1 | No  |
| P              | 26             | 2 | No  |
| P              | 30             | 2 | No  |
| P              | 32             | 4 | No  |
| 32             | P              | 4 | No  |
| P              | 46             | 3 | No  |
| 46             | P              | 3 | No  |
| P              | 50             | 4 | No  |
| P              | 51             | 3 | No  |
| P              | 55             | 4 | No  |
| 55             | P              | 4 | No  |
| P              | 56             | 2 | No  |
| P              | 58             | 4 | No  |
| 58             | P              | 4 | No  |
| P              | 60             | 3 | No  |
| 60             | P              | 3 | No  |
| P              | 61             | 3 | No  |
| 61             | P              | 3 | No  |

|                |    |   |    |
|----------------|----|---|----|
| 62             | 61 | 3 | No |
| 2              | 1  | 3 | No |
| 1              | 4  | 4 | No |
| 4              | 1  | 4 | No |
| I <sub>1</sub> | 1  | 3 | No |
| I <sub>2</sub> | 1  | 4 | No |
| 1              | 5  | 4 | No |
| 5              | 1  | 4 | No |
| 16             | 1  | 3 | No |
| 19             | 1  | 4 | No |
| 60             | 61 | 2 | No |
| 61             | 60 | 2 | No |
| 2              | 4  | 1 | No |
| 4              | 2  | 1 | No |
| I <sub>1</sub> | 2  | 4 | No |
| 2              | 5  | 3 | No |
| 5              | 2  | 3 | No |
| 2              | 13 | 4 | No |
| 13             | 2  | 4 | No |
| 2              | 22 | 3 | No |
| 22             | 2  | 3 | No |
| 2              | 23 | 2 | No |
| 23             | 2  | 2 | No |
| 2              | 24 | 3 | No |
| 24             | 2  | 3 | No |
| 26             | 2  | 4 | No |
| 30             | 2  | 4 | No |
| 2              | 32 | 4 | No |
| 32             | 2  | 4 | No |
| 2              | 50 | 4 | No |
| 50             | 2  | 4 | No |
| 58             | 60 | 1 | No |
| 60             | 58 | 1 | No |
| 58             | 61 | 3 | No |
| 61             | 58 | 3 | No |
| 4              | 5  | 4 | No |
| 5              | 4  | 4 | No |
| 4              | 22 | 4 | No |
| 22             | 4  | 4 | No |
| 4              | 23 | 3 | No |
| 23             | 4  | 3 | No |
| 4              | 24 | 4 | No |
| 24             | 4  | 4 | No |
| 4              | 32 | 3 | No |
| 32             | 4  | 3 | No |
| 4              | 36 | 4 | No |

|                |                |   |    |
|----------------|----------------|---|----|
| 36             | 4              | 4 | No |
| 4              | 46             | 4 | No |
| 46             | 4              | 4 | No |
| 4              | 49             | 4 | No |
| 49             | 4              | 4 | No |
| 4              | 51             | 4 | No |
| 51             | 4              | 4 | No |
| 57             | 58             | 2 | No |
| 58             | 57             | 2 | No |
| 57             | 60             | 3 | No |
| 60             | 57             | 3 | No |
| I <sub>2</sub> | I <sub>1</sub> | 1 | No |
| I <sub>1</sub> | 5              | 3 | No |
| 13             | I <sub>1</sub> | 4 | No |
| 16             | I <sub>1</sub> | 2 | No |
| 19             | I <sub>1</sub> | 3 | No |
| I <sub>1</sub> | 23             | 4 | No |
| 23             | I <sub>1</sub> | 4 | No |
| 26             | I <sub>1</sub> | 4 | No |
| 30             | I <sub>1</sub> | 4 | No |
| I <sub>1</sub> | 32             | 4 | No |
| 32             | I <sub>1</sub> | 4 | No |
| I <sub>1</sub> | 36             | 3 | No |
| 36             | I <sub>1</sub> | 3 | No |
| 40             | I <sub>1</sub> | 4 | No |
| I <sub>1</sub> | 49             | 3 | No |
| 49             | I <sub>1</sub> | 3 | No |
| 50             | I <sub>1</sub> | 2 | No |
| 51             | I <sub>1</sub> | 3 | No |
| I <sub>1</sub> | 52             | 3 | No |
| 52             | I <sub>1</sub> | 3 | No |
| 55             | I <sub>1</sub> | 4 | No |
| 56             | I <sub>1</sub> | 4 | No |
| 57             | I <sub>1</sub> | 4 | No |
| I <sub>1</sub> | 58             | 4 | No |
| 58             | I <sub>1</sub> | 4 | No |
| 57             | 56             | 4 | No |
| 56             | 58             | 4 | No |
| 58             | 56             | 4 | No |
| 56             | 60             | 3 | No |
| 60             | 56             | 3 | No |
| 56             | 61             | 3 | No |
| 61             | 56             | 3 | No |
| I <sub>2</sub> | 5              | 4 | No |
| 19             | I <sub>2</sub> | 2 | No |
| I <sub>2</sub> | 22             | 4 | No |

|                |                |   |    |
|----------------|----------------|---|----|
| 22             | I <sub>2</sub> | 4 | No |
| I <sub>2</sub> | 24             | 4 | No |
| 24             | I <sub>2</sub> | 4 | No |
| 26             | I <sub>2</sub> | 3 | No |
| 30             | I <sub>2</sub> | 3 | No |
| I <sub>2</sub> | 36             | 4 | No |
| 36             | I <sub>2</sub> | 4 | No |
| I <sub>2</sub> | 46             | 4 | No |
| 46             | I <sub>2</sub> | 4 | No |
| I <sub>2</sub> | 49             | 4 | No |
| 49             | I <sub>2</sub> | 4 | No |
| I <sub>2</sub> | 50             | 3 | No |
| I <sub>2</sub> | 51             | 4 | No |
| 51             | I <sub>2</sub> | 4 | No |
| I <sub>2</sub> | 52             | 4 | No |
| 52             | I <sub>2</sub> | 4 | No |
| 56             | I <sub>2</sub> | 3 | No |
| I <sub>2</sub> | 60             | 4 | No |
| 60             | I <sub>2</sub> | 4 | No |
| I <sub>2</sub> | 61             | 4 | No |
| 61             | I <sub>2</sub> | 4 | No |
| 55             | 56             | 4 | No |
| 55             | 57             | 4 | No |
| 57             | 55             | 4 | No |
| 55             | 58             | 2 | No |
| 58             | 55             | 2 | No |
| 55             | 60             | 3 | No |
| 55             | 61             | 3 | No |
| 13             | 5              | 1 | No |
| 5              | 22             | 2 | No |
| 22             | 5              | 2 | No |
| 5              | 23             | 3 | No |
| 23             | 5              | 3 | No |
| 5              | 24             | 4 | No |
| 24             | 5              | 4 | No |
| 5              | 49             | 4 | No |
| 49             | 5              | 4 | No |
| 5              | 51             | 4 | No |
| 51             | 5              | 4 | No |
| 5              | 52             | 4 | No |
| 52             | 5              | 4 | No |
| 55             | 5              | 3 | No |
| 5              | 58             | 3 | No |
| 58             | 5              | 3 | No |
| 5              | 60             | 4 | No |
| 60             | 5              | 4 | No |

|    |    |   |    |
|----|----|---|----|
| 62 | 5  | 3 | No |
| 55 | 52 | 3 | No |
| 57 | 52 | 1 | No |
| 58 | 52 | 3 | No |
| 52 | 60 | 4 | No |
| 60 | 52 | 4 | No |
| 52 | 61 | 4 | No |
| 61 | 52 | 4 | No |
| 10 | 22 | 3 | No |
| 22 | 10 | 3 | No |
| 10 | 23 | 2 | No |
| 23 | 10 | 2 | No |
| 10 | 24 | 3 | No |
| 24 | 10 | 3 | No |
| 10 | 36 | 3 | No |
| 10 | 50 | 2 | No |
| 50 | 10 | 2 | No |
| 10 | 52 | 3 | No |
| 51 | 55 | 3 | No |
| 55 | 51 | 3 | No |
| 13 | 22 | 3 | No |
| 22 | 13 | 3 | No |
| 13 | 49 | 3 | No |
| 13 | 58 | 2 | No |
| 58 | 13 | 2 | No |
| 13 | 60 | 3 | No |
| 50 | 52 | 3 | No |
| 52 | 50 | 3 | No |
| 57 | 50 | 4 | No |
| 19 | 16 | 3 | No |
| 16 | 26 | 4 | No |
| 26 | 16 | 4 | No |
| 16 | 30 | 4 | No |
| 30 | 16 | 4 | No |
| 16 | 32 | 4 | No |
| 32 | 16 | 4 | No |
| 16 | 40 | 4 | No |
| 40 | 16 | 4 | No |
| 16 | 49 | 3 | No |
| 49 | 16 | 3 | No |
| 16 | 50 | 4 | No |
| 50 | 16 | 4 | No |
| 16 | 55 | 4 | No |
| 55 | 16 | 4 | No |
| 16 | 56 | 4 | No |
| 56 | 16 | 4 | No |

|    |    |   |    |
|----|----|---|----|
| 16 | 57 | 4 | No |
| 57 | 16 | 4 | No |
| 16 | 58 | 4 | No |
| 58 | 16 | 4 | No |
| 49 | 51 | 2 | No |
| 51 | 49 | 2 | No |
| 49 | 58 | 3 | No |
| 58 | 49 | 3 | No |
| 49 | 60 | 4 | No |
| 60 | 49 | 4 | No |
| 49 | 61 | 4 | No |
| 61 | 49 | 4 | No |
| 26 | 19 | 3 | No |
| 19 | 30 | 3 | No |
| 30 | 19 | 3 | No |
| 19 | 46 | 4 | No |
| 46 | 19 | 4 | No |
| 19 | 51 | 4 | No |
| 51 | 19 | 4 | No |
| 19 | 56 | 3 | No |
| 56 | 19 | 3 | No |
| 19 | 60 | 4 | No |
| 60 | 19 | 4 | No |
| 19 | 61 | 4 | No |
| 61 | 19 | 4 | No |
| 46 | 49 | 2 | No |
| 49 | 46 | 2 | No |
| 46 | 51 | 2 | No |
| 51 | 46 | 2 | No |
| 46 | 60 | 4 | No |
| 60 | 46 | 4 | No |
| 46 | 61 | 4 | No |
| 61 | 46 | 4 | No |
| 46 | 62 | 3 | No |
| 62 | 46 | 3 | No |
| 22 | 23 | 3 | No |
| 23 | 22 | 3 | No |
| 22 | 24 | 4 | No |
| 24 | 22 | 4 | No |
| 22 | 30 | 3 | No |
| 30 | 22 | 3 | No |
| 22 | 46 | 4 | No |
| 46 | 22 | 4 | No |
| 22 | 61 | 4 | No |
| 61 | 22 | 4 | No |
| 22 | 62 | 1 | No |

|    |    |   |    |
|----|----|---|----|
| 62 | 22 | 1 | No |
| 40 | 46 | 3 | No |
| 46 | 40 | 3 | No |
| 40 | 49 | 3 | No |
| 49 | 40 | 3 | No |
| 40 | 50 | 2 | No |
| 23 | 24 | 1 | No |
| 24 | 23 | 1 | No |
| 23 | 26 | 4 | No |
| 26 | 23 | 4 | No |
| 23 | 32 | 4 | No |
| 32 | 23 | 4 | No |
| 23 | 58 | 4 | No |
| 58 | 23 | 4 | No |
| 23 | 62 | 4 | No |
| 62 | 23 | 4 | No |
| 40 | 36 | 1 | No |
| 36 | 46 | 4 | No |
| 46 | 36 | 4 | No |
| 36 | 49 | 4 | No |
| 49 | 36 | 4 | No |
| 36 | 50 | 1 | No |
| 50 | 36 | 1 | No |
| 36 | 51 | 4 | No |
| 51 | 36 | 4 | No |
| 36 | 52 | 4 | No |
| 52 | 36 | 4 | No |
| 26 | 24 | 3 | No |
| 24 | 60 | 4 | No |
| 60 | 24 | 4 | No |
| 24 | 61 | 4 | No |
| 61 | 24 | 4 | No |
| 32 | 36 | 3 | No |
| 36 | 32 | 3 | No |
| 32 | 40 | 2 | No |
| 40 | 32 | 2 | No |
| 32 | 46 | 3 | No |
| 46 | 32 | 3 | No |
| 32 | 49 | 3 | No |
| 49 | 32 | 3 | No |
| 32 | 50 | 4 | No |
| 50 | 32 | 4 | No |
| 32 | 51 | 3 | No |
| 51 | 32 | 3 | No |
| 32 | 55 | 4 | No |
| 55 | 32 | 4 | No |

|    |    |   |    |
|----|----|---|----|
| 26 | 30 | 4 | No |
| 30 | 26 | 4 | No |
| 26 | 32 | 2 | No |
| 32 | 26 | 2 | No |
| 26 | 40 | 4 | No |
| 40 | 26 | 4 | No |
| 26 | 50 | 4 | No |
| 26 | 55 | 4 | No |
| 55 | 26 | 4 | No |
| 26 | 56 | 4 | No |
| 26 | 58 | 4 | No |
| 58 | 26 | 4 | No |
| 26 | 60 | 3 | No |
| 26 | 61 | 3 | No |
| 30 | 32 | 4 | No |
| 32 | 30 | 4 | No |
| 30 | 40 | 4 | No |
| 40 | 30 | 4 | No |
| 30 | 46 | 1 | No |
| 46 | 30 | 1 | No |
| 30 | 49 | 3 | No |
| 49 | 30 | 3 | No |
| 30 | 50 | 4 | No |
| 50 | 30 | 4 | No |
| 30 | 51 | 3 | No |
| 51 | 30 | 3 | No |
| 30 | 55 | 4 | No |
| 55 | 30 | 4 | No |
| 30 | 56 | 4 | No |
| 56 | 30 | 4 | No |
| 30 | 58 | 4 | No |
| 58 | 30 | 4 | No |
| 30 | 60 | 3 | No |
| 60 | 30 | 3 | No |
| 30 | 61 | 3 | No |
| 61 | 30 | 3 | No |
| 30 | 62 | 2 | No |
| 62 | 30 | 2 | No |

**Table S3.** The 29 predicted reaction paths of the Claisen ester condensation.

| Paths                                                    | Sum of chemical distances |
|----------------------------------------------------------|---------------------------|
| R→I <sub>1</sub> →I <sub>2</sub> →P (Accepted mechanism) | 4                         |
| R→I <sub>1</sub> →P                                      | 4                         |
| R→I <sub>2</sub> →P                                      | 4                         |
| R→I <sub>1</sub> →I <sub>2</sub> →P                      | 6                         |

|                                        |   |
|----------------------------------------|---|
| R→1→19→P                               | 6 |
| R→1→I <sub>1</sub> →I <sub>2</sub> →P  | 6 |
| R→1→I <sub>2</sub> →P                  | 6 |
| R→I <sub>1</sub> →19→P                 | 6 |
| R→I <sub>2</sub> →19→P                 | 6 |
| R→I <sub>1</sub> →I <sub>2</sub> →19→P | 6 |
| R→2→30→P                               | 8 |
| R→2→26→P                               | 8 |
| R→2→I <sub>1</sub> →P                  | 8 |
| R→2→I <sub>1</sub> →I <sub>2</sub> →P  | 8 |
| R→5→I <sub>1</sub> →P                  | 8 |
| R→5→I <sub>2</sub> →P                  | 8 |
| R→5→I <sub>1</sub> →I <sub>2</sub> →P  | 8 |
| R→I <sub>1</sub> →16→P                 | 8 |
| R→I <sub>1</sub> →16→19→P              | 8 |
| R→I <sub>1</sub> →16→I <sub>2</sub> →P | 8 |
| R→I <sub>1</sub> →30→P                 | 8 |
| R→I <sub>1</sub> →I <sub>2</sub> →30→P | 8 |
| R→I <sub>2</sub> →30→P                 | 8 |
| R→I <sub>1</sub> →50→P                 | 8 |
| R→I <sub>1</sub> →50→I <sub>2</sub> →P | 8 |
| R→I <sub>1</sub> →51→P                 | 8 |
| R→I <sub>1</sub> →56→P                 | 8 |
| R→I <sub>2</sub> →56→P                 | 8 |
| R→I <sub>1</sub> →I <sub>2</sub> →56→P | 8 |

## 1.2. Cobalt-catalyzed hydroformylation.

**Table S4.** Information on the vertices of the reaction network obtained in Step 3 for the cobalt-catalyzed hydroformylation.

| Vertex name    | SMILES                                                                      | Included in the extracted minimal network? |
|----------------|-----------------------------------------------------------------------------|--------------------------------------------|
| R              | <chem>[CoH](=[C]=[O])(=[C]=[O])=[C]=[O].[CH2]=[CH2].[C]#[O].[HH]</chem>     | Yes                                        |
| P              | <chem>[CoH](=[C]=[O])(=[C]=[O])=[C]=[O].[CH2]([CH]=[O])[CH3]</chem>         | Yes                                        |
| I <sub>1</sub> | <chem>[CoH](=[C]=[O])(=[C]=[O])([CH2]1)([CH2]1)=[C]=[O].[C]#[O].[HH]</chem> | Yes                                        |
| I <sub>2</sub> | <chem>[Co](=[C]=[O])(=[C]=[O])([CH2][CH3])=[C]=[O].[C]#[O].[HH]</chem>      | Yes                                        |
| I <sub>3</sub> | <chem>[Co](=[C]=[O])(=[C]=[O])([CH2][CH3])(=[C]=[O])=[C]=[O].[HH]</chem>    | Yes                                        |
| I <sub>4</sub> | <chem>[Co](=[C]=[O])(=[C]=[O])([C]=[O])[CH2][CH3]=[C]=[O].[HH]</chem>       | Yes                                        |
| I <sub>5</sub> | <chem>[CoH2](=[C]=[O])(=[C]=[O])([C]=[O])[CH2][CH3]=[C]=[O]</chem>          | Yes                                        |
| 2              | <chem>[CoH](=[C]=[O])(=[C]=[O])(=[C]=[O])=[C]=[O].[CH2]=[CH2].[HH]</chem>   | Yes                                        |
| 3              | <chem>[CoH3](=[C]=[O])(=[C]=[O])=[C]=[O].[CH2]=[CH2].[C]#[O]</chem>         | Yes                                        |
| 5              | <chem>[Co](=[C]=[O])(=[C]=[O])(#[C][OH])=[C]=[O].[CH2]=[CH2].[HH]</chem>    | Yes                                        |

|     |                                                                      |     |
|-----|----------------------------------------------------------------------|-----|
| 7   | [Co](=[C]=[O])(=[C]=[O])([CH]=[O])=[C]=[O].[CH2]=[CH2].[HH]          | Yes |
| 8   | [CoH](=[C]=[O])(=[C]=[O])(=[CH2])=[C]=[O].[CH2]=[C]=[O].[HH]         | Yes |
| 12  | [CoH](=[C]=[O])(=[C]=[O])(=[C]=[O])=[C]=[O].[CH3][CH3]               | Yes |
| 14  | [Co](=[C]=[O])(=[C]=[O])([CH]=[O])=[C]=[O].[CH3][CH3]                | Yes |
| 20  | [CoH]1(=[C]=[O])(=[C]=[O])([CH2][CH2][C]1=[O])=[C]=[O].[HH]          | Yes |
| 22  | [Co](=[C]=[O])(=[C]=[O])(#[C][O][CH2][CH3])=[C]=[O].[HH]             | Yes |
| 23  | [CoH](=[C]=[O])(=[C]=[O])(=[CH][OH])=[C]=[O].[CH2]=[CH2]             | Yes |
| 24  | [CoH2](=[C]=[O])(=[C]=[O])([CH]=[O])=[C]=[O].[CH2]=[CH2]             | Yes |
| 27  | [CoH2](=[C]=[O])(=[C]=[O])([CH2][CH3])=[C]=[O].[C]#[O]               | Yes |
| 34  | [CoH](=[C]=[O])(=[C]=[O])=[C]=[O].[CH2]([CH]1[OH])[CH2]1             | Yes |
| 36  | [CoH](=[C]=[O])(=[C]=[O])=[C]=[O].[CH2]=[C]([OH])[CH3]               | Yes |
| 40  | [CoH](=[C]=[O])(=[C]=[O])([CH2]1)([CH2]1)=[C]=[O].[CH2]=[O]          | Yes |
| 49  | [Co](=[C]=[O])(=[C]=[O])([CH]([O]1)[CH2][CH2]1)=[C]=[O].[HH]         | Yes |
| 54  | [CoH]([C]=[O])([C]=[O])([CH2][CH3])=[C]=[O].[C][OH]                  | Yes |
| 55  | [Co](=[C]=[O])(=[C]=[O])([CH2][CH3])=[C]=[O].[CH2]=[O]               | Yes |
| 56  | [CoH]([C]=[O])([C]=[O])([CH2][CH3])=[C]=[O].[CH]=[O]                 | Yes |
| 57  | [CoH](=[C]=[O])(=[C]=[O])(=[CH2])=[C]=[O].[CH4].[C]#[O]              | Yes |
| 60  | [Co](=[C]=[O])(=[C]=[O])([CH3])=[C]=[O].[CH2]=[C]=[O].[HH]           | Yes |
| 64  | [CoH](=[C]=[O])(=[C]=[O])(=[CH2])=[C]=[O].[CH2]=[CH][OH]             | Yes |
| 65  | [CoH]([C]=[O])([C]=[O])([CH3])=[C]=[O].[CH2]=[C][OH]                 | Yes |
| 66  | [CoH](=[C]=[O])(=[C]=[O])(=[CH2])=[C]=[O].[CH3][CH]=[O]              | Yes |
| 67  | [CoH2](=[C]=[O])(=[C]=[O])([CH3])=[C]=[O].[CH2]=[C]=[O]              | Yes |
| 71  | [CoH](=[C]=[O])(=[C]=[O])([CH2]1)([O]1)=[C]=[O].[CH2]=[CH2]          | Yes |
| 99  | [CoH2](=[C]=[O])(=[C]=[O])([CH]([O]1)[CH2][CH2]1)=[C]=[O]            | Yes |
| 109 | [CoH](=[C]=[O])(=[C]=[O])([CH2][CH2]1)([CH]1[OH])=[C]=[O]            | Yes |
| 117 | [CoH](=[C]=[O])(=[C]=[O])(=[CH][O][CH2][CH3])=[C]=[O]                | Yes |
| 121 | [Co](=[C]=[O])(=[C]=[O])([CH]([OH])[CH2][CH3])=[C]=[O]               | Yes |
| 122 | [CoH](=[C]=[O])(=[C]=[O])(=[C]([OH])[CH2][CH3])=[C]=[O]              | Yes |
| 128 | [CoH](=[C]=[O])(=[C]=[O])([CH2][CH3])([CH]=[O])=[C]=[O]              | Yes |
| 1   | [CoH](=[C]=[O])(=[C]=[O])=[C]=[O].[CH3][CH3].[C]#[O]                 | No  |
| 10  | [CoH](=[C]=[O])(=[C]=[O])=[C]=[O].[CH2]=[CH2].[CH2]=[O]              | No  |
| 15  | [CoH](=[C]=[O])(=[C]=[O])=[C]=[O].[CH3][C](=[O])[CH3]                | No  |
| 19  | [CoH](=[C]=[O])(=[C]=[O])(=[C]([O]1)[CH2][CH2]1)=[C]=[O].[HH]        | No  |
| 26  | [CoH3](=[C]=[O])(=[C]=[O])=[C]=[O].[CH2]1[C](=[O])[CH2]1             | No  |
| 28  | [CoH](=[C]=[O])(=[C]=[O])([C]1([CH2]2)[CH2]2)([O]1)=[C]=[O].[H<br>H] | No  |
| 30  | [Co](=[C]=[O])(=[C]=[O])([O][CH]([CH2]1)[CH2]1)=[C]=[O].[HH]         | No  |
| 38  | [Co]([C]=[O])([C]=[O])([CH2]1)([CH2]1)=[C]=[O].[CH]=[O].[HH]         | No  |
| 70  | [CoH](=[C]=[O])(=[C]=[O])=[C]=[O].[CH2]([CH2]1)[CH2][O]1             | No  |
| 73  | [CoH](=[C]=[O])(=[C]=[O])([CH]1[CH2][CH3])([O]1)=[C]=[O]             | No  |
| 74  | [CoH](=[C]=[O])(=[C]=[O])=[C]=[O].[CH2]=[CH][O][CH3]                 | No  |
| 75  | [CoH](=[C]=[O])(=[C]=[O])=[C]=[O].[CH2]([O]1)[CH]1[CH3]              | No  |
| 76  | [CoH](=[C]=[O])(=[C]=[O])([CH3])([O][CH]=[CH2])=[C]=[O]              | No  |
| 77  | [CoH](=[C]=[O])(=[C]=[O])([CH2][CH]=[O])([CH3])=[C]=[O]              | No  |

|     |                                                           |    |
|-----|-----------------------------------------------------------|----|
| 136 | [CoH2](=[C]=[O])(=[C]=[O])([O][CH]([CH2]1)[CH2]1)=[C]=[O] | No |
|-----|-----------------------------------------------------------|----|

**Table S5.** Information on the edges of the reaction network obtained in Step 3 for the cobalt-catalyzed hydroformylation.

| Source         | Target         | Chemical distance | Included in the extracted minimal network? |
|----------------|----------------|-------------------|--------------------------------------------|
| R              | 2              | 1                 | Yes                                        |
| R              | 3              | 3                 | Yes                                        |
| R              | I <sub>1</sub> | 2                 | Yes                                        |
| R              | 5              | 3                 | Yes                                        |
| R              | 7              | 3                 | Yes                                        |
| R              | I <sub>2</sub> | 3                 | Yes                                        |
| R              | 8              | 3                 | Yes                                        |
| I <sub>4</sub> | P              | 4                 | Yes                                        |
| 23             | P              | 4                 | Yes                                        |
| 24             | P              | 4                 | Yes                                        |
| 54             | P              | 4                 | Yes                                        |
| 55             | P              | 4                 | Yes                                        |
| 56             | P              | 2                 | Yes                                        |
| 64             | P              | 4                 | Yes                                        |
| 65             | P              | 4                 | Yes                                        |
| 66             | P              | 4                 | Yes                                        |
| 67             | P              | 4                 | Yes                                        |
| 117            | P              | 3                 | Yes                                        |
| 122            | P              | 3                 | Yes                                        |
| I <sub>5</sub> | P              | 3                 | Yes                                        |
| 128            | I <sub>5</sub> | 4                 | Yes                                        |
| I <sub>1</sub> | 2              | 3                 | Yes                                        |
| 2              | 7              | 2                 | Yes                                        |
| 2              | 12             | 3                 | Yes                                        |
| 2              | 20             | 2                 | Yes                                        |
| 2              | 22             | 3                 | Yes                                        |
| 2              | I <sub>4</sub> | 3                 | Yes                                        |
| 2              | I <sub>3</sub> | 3                 | Yes                                        |
| 2              | 23             | 3                 | Yes                                        |
| 2              | 24             | 3                 | Yes                                        |
| 128            | 122            | 4                 | Yes                                        |
| 3              | 24             | 3                 | Yes                                        |
| 3              | 27             | 3                 | Yes                                        |
| 121            | 122            | 2                 | Yes                                        |
| I <sub>1</sub> | I <sub>2</sub> | 3                 | Yes                                        |
| I <sub>1</sub> | 20             | 3                 | Yes                                        |

|                |                |   |     |
|----------------|----------------|---|-----|
| I <sub>1</sub> | I <sub>3</sub> | 4 | Yes |
| I <sub>1</sub> | 27             | 4 | Yes |
| I <sub>1</sub> | 40             | 3 | Yes |
| 5              | I <sub>4</sub> | 3 | Yes |
| 5              | 23             | 3 | Yes |
| 109            | 122            | 3 | Yes |
| 7              | 14             | 3 | Yes |
| 7              | I <sub>4</sub> | 3 | Yes |
| 7              | 23             | 3 | Yes |
| 7              | 24             | 3 | Yes |
| 7              | 49             | 2 | Yes |
| 99             | 117            | 3 | Yes |
| 99             | I <sub>5</sub> | 3 | Yes |
| I <sub>2</sub> | I <sub>4</sub> | 3 | Yes |
| I <sub>2</sub> | I <sub>3</sub> | 1 | Yes |
| I <sub>2</sub> | 27             | 3 | Yes |
| I <sub>2</sub> | 55             | 3 | Yes |
| I <sub>2</sub> | 57             | 4 | Yes |
| 8              | 57             | 4 | Yes |
| 8              | 60             | 2 | Yes |
| 8              | 64             | 3 | Yes |
| 8              | 65             | 3 | Yes |
| 8              | 66             | 3 | Yes |
| 8              | 67             | 3 | Yes |
| 12             | 14             | 2 | Yes |
| 12             | 128            | 3 | Yes |
| 14             | 55             | 4 | Yes |
| 14             | 121            | 3 | Yes |
| 71             | 117            | 4 | Yes |
| 20             | I <sub>4</sub> | 3 | Yes |
| 20             | 109            | 3 | Yes |
| 20             | 122            | 4 | Yes |
| 20             | I <sub>5</sub> | 4 | Yes |
| 20             | 128            | 4 | Yes |
| 22             | I <sub>4</sub> | 2 | Yes |
| 22             | 117            | 3 | Yes |
| I <sub>3</sub> | I <sub>4</sub> | 2 | Yes |
| 49             | I <sub>4</sub> | 3 | Yes |
| 60             | I <sub>4</sub> | 3 | Yes |
| I <sub>4</sub> | 121            | 3 | Yes |
| I <sub>4</sub> | 122            | 3 | Yes |
| I <sub>4</sub> | I <sub>5</sub> | 3 | Yes |
| I <sub>3</sub> | 128            | 3 | Yes |
| 23             | 34             | 3 | Yes |
| 23             | 71             | 3 | Yes |
| 23             | 109            | 2 | Yes |

|                |                |   |     |
|----------------|----------------|---|-----|
| 23             | 117            | 3 | Yes |
| 23             | 121            | 3 | Yes |
| 23             | 122            | 3 | Yes |
| 23             | 128            | 3 | Yes |
| 60             | 65             | 3 | Yes |
| 60             | 67             | 3 | Yes |
| 24             | 71             | 3 | Yes |
| 24             | 99             | 2 | Yes |
| 24             | 117            | 3 | Yes |
| 24             | I <sub>5</sub> | 3 | Yes |
| 24             | 128            | 3 | Yes |
| 57             | 66             | 3 | Yes |
| 27             | I <sub>5</sub> | 3 | Yes |
| 128            | 55             | 3 | Yes |
| 54             | 56             | 2 | Yes |
| 65             | 54             | 4 | Yes |
| 49             | 117            | 4 | Yes |
| 34             | 64             | 3 | Yes |
| 34             | 122            | 4 | Yes |
| 40             | 55             | 3 | Yes |
| 65             | 36             | 2 | Yes |
| 36             | 122            | 3 | Yes |
| P              | 12             | 4 | No  |
| P              | 14             | 4 | No  |
| P              | I <sub>4</sub> | 4 | No  |
| P              | 23             | 4 | No  |
| P              | 27             | 4 | No  |
| P              | 55             | 4 | No  |
| P              | 66             | 4 | No  |
| P              | 67             | 4 | No  |
| P              | 73             | 2 | No  |
| P              | 76             | 3 | No  |
| P              | 77             | 3 | No  |
| P              | 117            | 3 | No  |
| P              | 121            | 3 | No  |
| P              | 122            | 3 | No  |
| P              | I <sub>5</sub> | 3 | No  |
| P              | 128            | 3 | No  |
| 3              | 1              | 4 | No  |
| I <sub>2</sub> | 1              | 4 | No  |
| 1              | 12             | 1 | No  |
| 1              | 14             | 3 | No  |
| 14             | 1              | 3 | No  |
| 1              | 27             | 3 | No  |
| 27             | 1              | 3 | No  |
| 54             | 1              | 3 | No  |

|                |                |   |    |
|----------------|----------------|---|----|
| 56             | 1              | 3 | No |
| 1              | 57             | 4 | No |
| 57             | 1              | 4 | No |
| I <sub>5</sub> | 128            | 4 | No |
| 2              | 3              | 4 | No |
| 3              | 2              | 4 | No |
| 2              | I <sub>1</sub> | 3 | No |
| 5              | 2              | 2 | No |
| 7              | 2              | 2 | No |
| 2              | I <sub>2</sub> | 4 | No |
| 8              | 2              | 4 | No |
| 10             | 2              | 4 | No |
| 19             | 2              | 2 | No |
| 20             | 2              | 2 | No |
| 22             | 2              | 3 | No |
| 23             | 2              | 3 | No |
| 24             | 2              | 3 | No |
| 122            | I <sub>5</sub> | 2 | No |
| I <sub>5</sub> | 122            | 2 | No |
| 122            | 128            | 4 | No |
| 10             | 3              | 4 | No |
| 24             | 3              | 3 | No |
| 26             | 3              | 2 | No |
| 122            | 121            | 2 | No |
| 121            | I <sub>5</sub> | 4 | No |
| I <sub>5</sub> | 121            | 4 | No |
| 121            | 128            | 4 | No |
| 128            | 121            | 4 | No |
| I <sub>2</sub> | I <sub>1</sub> | 3 | No |
| 8              | I <sub>1</sub> | 3 | No |
| 20             | I <sub>1</sub> | 3 | No |
| 38             | I <sub>1</sub> | 2 | No |
| 54             | I <sub>1</sub> | 4 | No |
| 56             | I <sub>1</sub> | 4 | No |
| 117            | 121            | 4 | No |
| 117            | 122            | 4 | No |
| 122            | 117            | 4 | No |
| 117            | I <sub>5</sub> | 4 | No |
| I <sub>5</sub> | 117            | 4 | No |
| 117            | 128            | 2 | No |
| 5              | 7              | 2 | No |
| 7              | 5              | 2 | No |
| 5              | I <sub>2</sub> | 4 | No |
| 5              | 22             | 3 | No |
| 5              | I <sub>3</sub> | 3 | No |
| 109            | 121            | 3 | No |

|                |                |   |    |
|----------------|----------------|---|----|
| 121            | 109            | 3 | No |
| 122            | 109            | 3 | No |
| 109            | 128            | 3 | No |
| 128            | 109            | 3 | No |
| 7              | I <sub>2</sub> | 4 | No |
| 10             | 7              | 4 | No |
| 7              | 22             | 3 | No |
| 22             | 7              | 3 | No |
| 7              | I <sub>3</sub> | 3 | No |
| 24             | 7              | 3 | No |
| 38             | 7              | 3 | No |
| 49             | 7              | 2 | No |
| 99             | 109            | 4 | No |
| 117            | 99             | 3 | No |
| 99             | 136            | 4 | No |
| 136            | 99             | 4 | No |
| 8              | I <sub>2</sub> | 4 | No |
| 22             | I <sub>2</sub> | 3 | No |
| I <sub>4</sub> | I <sub>2</sub> | 3 | No |
| 38             | I <sub>2</sub> | 3 | No |
| 54             | I <sub>2</sub> | 3 | No |
| 56             | I <sub>2</sub> | 3 | No |
| 57             | I <sub>2</sub> | 4 | No |
| 60             | I <sub>2</sub> | 4 | No |
| 77             | 128            | 4 | No |
| 128            | 77             | 4 | No |
| 8              | 20             | 2 | No |
| 60             | 8              | 2 | No |
| 65             | 8              | 3 | No |
| 76             | 77             | 2 | No |
| 77             | 76             | 2 | No |
| 10             | 23             | 3 | No |
| 10             | 24             | 3 | No |
| 10             | 40             | 2 | No |
| 10             | 55             | 3 | No |
| 10             | 56             | 3 | No |
| 56             | 10             | 3 | No |
| 10             | 71             | 2 | No |
| 75             | 76             | 4 | No |
| 75             | 77             | 4 | No |
| 75             | 117            | 4 | No |
| 14             | 12             | 2 | No |
| 15             | 12             | 4 | No |
| 22             | 12             | 4 | No |
| I <sub>4</sub> | 12             | 4 | No |
| I <sub>3</sub> | 12             | 4 | No |

|                |     |   |    |
|----------------|-----|---|----|
| 23             | 12  | 4 | No |
| 24             | 12  | 4 | No |
| 27             | 12  | 4 | No |
| 54             | 12  | 4 | No |
| 56             | 12  | 4 | No |
| 117            | 12  | 3 | No |
| 122            | 12  | 3 | No |
| I <sub>5</sub> | 12  | 3 | No |
| 128            |     | 3 | No |
| 74             | 76  | 3 | No |
| 74             | 77  | 3 | No |
| 22             | 14  | 4 | No |
| I <sub>4</sub> | 14  | 4 | No |
| I <sub>3</sub> | 14  | 4 | No |
| 23             | 14  | 4 | No |
| 24             | 14  | 4 | No |
| 55             | 14  | 4 | No |
| 56             | 14  | 4 | No |
| 117            | 14  | 3 | No |
| 121            | 14  | 3 | No |
| 14             | 128 | 3 | No |
| 128            | 14  | 3 | No |
| 73             | 76  | 3 | No |
| 76             | 73  | 3 | No |
| 99             | 73  | 4 | No |
| 73             | 109 | 4 | No |
| 109            | 73  | 4 | No |
| 117            | 73  | 3 | No |
| 73             | 121 | 3 | No |
| 121            | 73  | 3 | No |
| 73             | 122 | 3 | No |
| 122            | 73  | 3 | No |
| I <sub>5</sub> | 73  | 3 | No |
| 73             | 128 | 3 | No |
| 128            | 73  | 3 | No |
| 136            | 73  | 4 | No |
| 65             | 15  | 4 | No |
| 15             | 66  | 4 | No |
| 66             | 15  | 4 | No |
| 15             | 67  | 4 | No |
| 67             | 15  | 4 | No |
| 71             | 73  | 3 | No |
| 117            | 71  | 4 | No |
| 71             | 128 | 4 | No |
| 19             | 20  | 2 | No |
| 19             | 22  | 3 | No |

|                |                |   |    |
|----------------|----------------|---|----|
| 19             | I <sub>4</sub> | 3 | No |
| 19             | 28             | 3 | No |
| 28             | 19             | 3 | No |
| 19             | 49             | 2 | No |
| 19             | 70             | 4 | No |
| 19             | 99             | 3 | No |
| 19             | 117            | 4 | No |
| 19             | 122            | 4 | No |
| 19             | I <sub>5</sub> | 4 | No |
| 70             | 71             | 4 | No |
| 70             | 99             | 3 | No |
| 99             | 70             | 3 | No |
| 70             | 117            | 4 | No |
| 20             | I <sub>3</sub> | 3 | No |
| 28             | 20             | 3 | No |
| 20             | 49             | 4 | No |
| 49             | 20             | 4 | No |
| 74             | 67             | 4 | No |
| 67             | 76             | 3 | No |
| 67             | 77             | 3 | No |
| 67             | I <sub>5</sub> | 3 | No |
| I <sub>5</sub> | 67             | 3 | No |
| 22             | I <sub>3</sub> | 2 | No |
| 22             | 49             | 3 | No |
| 49             | 22             | 3 | No |
| 66             | 67             | 4 | No |
| 67             | 66             | 4 | No |
| 74             | 66             | 4 | No |
| 75             | 66             | 3 | No |
| 66             | 76             | 3 | No |
| 66             | 77             | 3 | No |
| 66             | 128            | 3 | No |
| I <sub>4</sub> | I <sub>3</sub> | 2 | No |
| I <sub>5</sub> | I <sub>4</sub> | 3 | No |
| 65             | 66             | 4 | No |
| 65             | 67             | 2 | No |
| 65             | 74             | 4 | No |
| 74             | 65             | 4 | No |
| 65             | 76             | 3 | No |
| 65             | 77             | 3 | No |
| 65             | 122            | 3 | No |
| I <sub>3</sub> | 27             | 4 | No |
| 27             | I <sub>3</sub> | 4 | No |
| 38             | I <sub>3</sub> | 4 | No |
| 54             | I <sub>3</sub> | 4 | No |
| I <sub>3</sub> | 55             | 4 | No |

|                |                |   |    |
|----------------|----------------|---|----|
| 55             | I <sub>3</sub> | 4 | No |
| 56             | I <sub>3</sub> | 4 | No |
| 128            | I <sub>3</sub> | 3 | No |
| 65             | 64             | 2 | No |
| 64             | 66             | 2 | No |
| 66             | 64             | 2 | No |
| 64             | 67             | 4 | No |
| 67             | 64             | 4 | No |
| 74             | 64             | 4 | No |
| 64             | 76             | 3 | No |
| 64             | 77             | 3 | No |
| 64             | 109            | 2 | No |
| 23             | 24             | 2 | No |
| 24             | 23             | 2 | No |
| 34             | 23             | 3 | No |
| 54             | 23             | 4 | No |
| 56             | 23             | 4 | No |
| 23             | 64             | 4 | No |
| 64             | 23             | 4 | No |
| 117            | 23             | 3 | No |
| 65             | 60             | 3 | No |
| 24             | 27             | 4 | No |
| 56             | 24             | 4 | No |
| 99             | 24             | 2 | No |
| 66             | 57             | 3 | No |
| 26             | 34             | 4 | No |
| 26             | I <sub>5</sub> | 4 | No |
| 26             | 136            | 3 | No |
| 56             | 57             | 3 | No |
| 56             | 64             | 4 | No |
| 56             | 66             | 2 | No |
| 56             | 74             | 4 | No |
| 74             | 56             | 4 | No |
| 56             | 77             | 3 | No |
| 56             | 117            | 3 | No |
| 56             | 128            | 1 | No |
| 54             | 27             | 2 | No |
| 27             | 55             | 4 | No |
| 55             | 27             | 4 | No |
| 56             | 27             | 2 | No |
| 27             | 57             | 3 | No |
| 57             | 27             | 3 | No |
| 66             | 27             | 4 | No |
| 67             | 27             | 4 | No |
| I <sub>5</sub> | 27             | 3 | No |
| 27             | 128            | 3 | No |

|     |     |   |    |
|-----|-----|---|----|
| 128 | 27  | 3 | No |
| 56  | 55  | 2 | No |
| 66  | 55  | 4 | No |
| 55  | 128 | 3 | No |
| 28  | 30  | 3 | No |
| 28  | 73  | 4 | No |
| 28  | 136 | 4 | No |
| 54  | 55  | 4 | No |
| 56  | 54  | 2 | No |
| 54  | 57  | 3 | No |
| 54  | 64  | 4 | No |
| 54  | 65  | 4 | No |
| 54  | 66  | 4 | No |
| 54  | 122 | 3 | No |
| 54  | 128 | 3 | No |
| 30  | 34  | 4 | No |
| 34  | 30  | 4 | No |
| 30  | 49  | 4 | No |
| 49  | 30  | 4 | No |
| 30  | 136 | 3 | No |
| 136 | 30  | 3 | No |
| 49  | 70  | 4 | No |
| 70  | 49  | 4 | No |
| 49  | 99  | 3 | No |
| 99  | 49  | 3 | No |
| 49  | 121 | 4 | No |
| 64  | 34  | 3 | No |
| 34  | 109 | 3 | No |
| 34  | 121 | 4 | No |
| 34  | 136 | 3 | No |
| 55  | 40  | 3 | No |
| 56  | 40  | 3 | No |
| 70  | 40  | 4 | No |
| 40  | 71  | 4 | No |
| 71  | 40  | 4 | No |
| 40  | 77  | 4 | No |
| 40  | 128 | 4 | No |
| 54  | 36  | 4 | No |
| 36  | 64  | 4 | No |
| 64  | 36  | 4 | No |
| 36  | 66  | 4 | No |
| 36  | 67  | 4 | No |
| 38  | 40  | 3 | No |
| 38  | 55  | 4 | No |
| 38  | 56  | 4 | No |

**Table S6.** The 91 predicted reaction paths of the cobalt-catalyzed hydroformylation.

| <b>Paths</b>                                                                                 | <b>Sum of chemical distances</b> |
|----------------------------------------------------------------------------------------------|----------------------------------|
| R→2→24→P                                                                                     | 8                                |
| R→2→23→P                                                                                     | 8                                |
| R→2→I <sub>4</sub> →P                                                                        | 8                                |
| R→3→24→P                                                                                     | 10                               |
| R→5→23→P                                                                                     | 10                               |
| R→5→I <sub>4</sub> →P                                                                        | 10                               |
| R→7→24→P                                                                                     | 10                               |
| R→7→23→P                                                                                     | 10                               |
| R→7→I <sub>4</sub> →P                                                                        | 10                               |
| R→2→7→24→P                                                                                   | 10                               |
| R→2→7→23→P                                                                                   | 10                               |
| R→2→7→I <sub>4</sub> →P                                                                      | 10                               |
| R→I <sub>2</sub> →55→P                                                                       | 10                               |
| R→I <sub>2</sub> →I <sub>4</sub> →P                                                          | 10                               |
| R→I <sub>2</sub> →I <sub>3</sub> →I <sub>4</sub> →P                                          | 10                               |
| R→8→67→P                                                                                     | 10                               |
| R→8→66→P                                                                                     | 10                               |
| R→8→65→P                                                                                     | 10                               |
| R→8→64→P                                                                                     | 10                               |
| R→2→20→I <sub>4</sub> →P                                                                     | 10                               |
| R→2→20→I <sub>5</sub> →P                                                                     | 10                               |
| R→2→20→122→P                                                                                 | 10                               |
| R→2→22→I <sub>4</sub> →P                                                                     | 10                               |
| R→2→22→117→P                                                                                 | 10                               |
| R→2→I <sub>3</sub> →I <sub>4</sub> →P                                                        | 10                               |
| R→2→24→117→P                                                                                 | 10                               |
| R→2→23→117→P                                                                                 | 10                               |
| R→2→23→122→P                                                                                 | 10                               |
| R→2→I <sub>4</sub> →122→P                                                                    | 10                               |
| R→2→24→I <sub>5</sub> →P                                                                     | 10                               |
| R→2→I <sub>4</sub> →I <sub>5</sub> →P                                                        | 10                               |
| R→I <sub>1</sub> →I <sub>2</sub> →I <sub>3</sub> →I <sub>4</sub> →P (Heck-Breslow mechanism) | 12                               |
| R→I <sub>1</sub> →40→55→P                                                                    | 12                               |
| R→I <sub>1</sub> →I <sub>2</sub> →55→P                                                       | 12                               |
| R→I <sub>1</sub> →2→24→P                                                                     | 12                               |
| R→I <sub>1</sub> →I <sub>2</sub> →I <sub>4</sub> →P                                          | 12                               |
| R→I <sub>1</sub> →20→I <sub>4</sub> →P                                                       | 12                               |
| R→I <sub>1</sub> →2→23→P                                                                     | 12                               |
| R→I <sub>1</sub> →I <sub>3</sub> →I <sub>4</sub> →P                                          | 12                               |
| R→I <sub>1</sub> →20→I <sub>5</sub> →P                                                       | 12                               |



|                                           |    |
|-------------------------------------------|----|
| R→2→24→128→I <sub>5</sub> →P              | 14 |
| R→2→24→128→122→P                          | 14 |
| R→2→23→128→55→P                           | 14 |
| R→2→23→128→I <sub>5</sub> →P              | 14 |
| R→2→23→128→122→P                          | 14 |
| R→2→I <sub>3</sub> →128→55→P              | 14 |
| R→2→I <sub>3</sub> →128→I <sub>5</sub> →P | 14 |
| R→2→I <sub>3</sub> →128→122→P             | 14 |

## 2. DFT-optimized Cartesian coordinates of intermediates and transition states

The following is the Cartesian coordinates of intermediates and transition states in the paths shown in Fig. 9:

### Structure Co(CO)<sub>3</sub>H

Co 0.000001 -0.245699 -0.000374  
C -1.746218 -0.618395 0.000124  
O -2.835524 -0.941438 0.000447  
C -0.000003 1.555500 -0.000388  
O -0.000011 2.692672 0.000434  
C 1.746222 -0.618389 0.000124  
O 2.835530 -0.941426 0.000447  
H 0.000002 -1.756881 0.000321

### Structure C<sub>2</sub>H<sub>4</sub>

C 0.000000 0.000000 0.661568  
C 0.000000 0.000000 -0.661568  
H 0.000000 0.923204 1.233890  
H 0.000000 -0.923204 1.233890  
H 0.000000 0.923204 -1.233890  
H 0.000000 -0.923204 -1.233890

### Structure CO

C 0.000000 0.000000 -0.643619  
O 0.000000 0.000000 0.482714

### Structure H<sub>2</sub>

H 0.000000 0.000000 0.373292  
H 0.000000 0.000000 -0.373292

### Structure I<sub>1</sub>

Co -0.000147 -0.129207 -0.143279  
C 0.000672 -1.907365 1.176382  
C 0.002868 -0.807957 1.978537  
H -0.920305 -2.435300 0.952680

H 0.920106 -2.436666 0.949599  
H -0.918117 -0.425544 2.406987  
H 0.925966 -0.426872 2.403614  
H -0.000257 -1.315619 -1.054615  
C -1.648101 -0.106041 -0.826883  
O -2.670855 -0.126293 -1.332458  
C -0.000556 1.539409 0.526725  
O -0.000883 2.607107 0.923544  
C 1.647286 -0.104977 -0.828324  
O 2.669684 -0.124541 -1.334630

### Structure T<sub>1</sub>

C 0.000013 -1.876443 1.211191  
C -0.000003 -0.720890 1.977732  
H -0.915265 -2.452346 1.106800  
H 0.915312 -2.452312 1.106794  
H -0.920745 -0.369246 2.432120  
H 0.920731 -0.369222 2.432120  
H -0.000010 -1.577124 -0.508481  
Co -0.000003 -0.146407 -0.058172  
C -1.589703 -0.120051 -0.908724  
O -2.571385 -0.118417 -1.490495  
C 0.000007 1.536939 0.537615  
O 0.000018 2.608879 0.924360  
C 1.589692 -0.120059 -0.908736  
O 2.571370 -0.118428 -1.490513

### Structure I<sub>2</sub>

Co -0.004022 0.000274 0.098890  
C 1.646326 0.030090 1.625559  
C 1.967594 0.038185 0.166687  
H 1.965872 0.930858 2.153395  
H 1.999183 -0.860000 2.150295  
H 2.448973 0.942319 -0.201386  
H 2.483208 -0.846074 -0.203466  
H 0.510994 0.008745 1.831278  
C -1.749502 -0.034612 0.527687  
O -2.854550 -0.056315 0.801411  
C 0.019352 1.610237 -0.693849  
O 0.057655 2.591973 -1.273707  
C 0.082273 -1.607017 -0.695465  
O 0.159906 -2.586225 -1.275688

### Structure T<sub>2</sub>

Co -0.540744 0.080158 0.156224  
C -0.838445 -1.878100 -0.111356  
C 0.013226 1.794578 0.165454

C 0.063130 -0.370588 1.777096  
C -2.006244 0.301812 -0.844349  
C 0.400840 -2.050463 -0.974537  
H -1.752386 -2.135272 -0.652257  
H -0.806376 -2.501947 0.784685  
O 0.382519 2.870708 0.159329  
O 0.344304 -0.679383 2.837129  
O -2.999452 0.415039 -1.390521  
H 0.527924 -1.228537 -1.699686  
H 0.351414 -2.966222 -1.578879  
H 1.316026 -2.105373 -0.376148  
C 2.858811 0.412330 -0.797413  
O 3.774575 -0.166906 -1.104078

### Structure I<sub>3</sub>

Co 0.234723 -0.000002 0.006986  
C -0.291047 -1.588121 -0.696349  
O -0.668611 -2.586782 -1.091627  
C -2.833578 0.001011 -0.109026  
C -1.668357 -0.002394 0.856432  
H -2.843642 -0.878234 -0.760656  
H -3.781533 -0.000774 0.445137  
H -1.704256 -0.885996 1.501510  
H -1.703751 0.877085 1.507121  
H -2.843417 0.884649 -0.754700  
C 1.886143 0.001770 -0.743670  
O 2.917648 0.002620 -1.218784  
C -0.290396 1.591828 -0.688308  
O -0.667046 2.592903 -1.078330  
C 0.785709 -0.004665 1.743296  
O 1.044037 -0.007895 2.851079

### Structure T<sub>3</sub>

C 1.121231 -1.106234 0.072572  
O 1.927659 -1.907285 0.278304  
C 2.620293 1.196198 -0.269929  
C 1.610091 0.401629 -1.064528  
H 3.177709 0.563926 0.428573  
H 3.352106 1.666633 -0.937642  
H 2.079468 -0.343710 -1.711480  
H 1.021630 1.030549 -1.735018  
H 2.140844 1.989581 0.310577  
Co -0.265284 -0.047795 -0.006972  
C -0.621213 -0.125186 1.754919  
O -0.853398 -0.210006 2.866597  
C -0.949691 1.625023 -0.264359  
O -1.332633 2.683227 -0.427017

C -1.392169 -1.060762 -1.039096  
O -2.109173 -1.716001 -1.630912

#### **Structure I<sub>4</sub>**

Co -0.389332 -0.011985 -0.028710  
C 1.325988 0.661022 0.119316  
O 2.091422 1.258350 0.794960  
C 2.760139 -0.966158 -1.133524  
C 1.608492 0.017458 -1.253626  
H 3.648009 -0.457311 -0.748358  
H 3.003754 -1.408716 -2.102623  
H 1.826265 0.845349 -1.935926  
H 0.713566 -0.490113 -1.681435  
H 2.510181 -1.777339 -0.442773  
C -0.121353 -1.040306 1.416836  
O -0.003540 -1.629323 2.385079  
C -1.827779 -0.890928 -0.759316  
O -2.723977 -1.430858 -1.203265  
C -1.066865 1.646220 0.035285  
O -1.521598 2.682815 0.165284

#### **Structure T<sub>4</sub>**

Co -0.591957 0.023392 -0.002768  
C -0.618854 -1.685559 -0.546455  
C -0.367605 1.734302 -0.492365  
C -2.321224 0.142484 0.550648  
C 1.343026 -0.105690 -0.335050  
O -0.660181 -2.733927 -0.987738  
O -0.258944 2.789296 -0.904681  
O -3.400458 0.216896 0.899053  
O 1.948137 -0.096624 -1.363914  
C 2.014668 -0.224643 1.030968  
C 3.501956 0.074284 0.985481  
H 1.825014 -1.251161 1.376252  
H 1.491334 0.425663 1.745063  
H 3.951620 -0.049291 1.974153  
H 3.686200 1.098845 0.650607  
H 4.009134 -0.593102 0.284935  
H -0.656670 -0.268009 2.922241  
H -0.664015 -1.010720 2.820378

#### **Structure I<sub>5</sub>'**

Co -0.608855 0.000206 -0.283547  
H -0.252191 -0.418118 -1.854632  
H -0.251666 0.417366 -1.855059  
C 1.360552 -0.000018 0.167837  
O 1.757988 0.000628 1.294061

C 3.772080 -0.001124 -0.627521  
C 2.309774 -0.001058 -1.022585  
H 4.409441 -0.001043 -1.516080  
H 4.018267 0.878702 -0.027611  
H 2.055067 -0.874090 -1.638012  
H 2.055550 0.871216 -1.639270  
H 4.018314 -0.881047 -0.027778  
C -0.569384 -1.599040 0.552343  
O -0.541568 -2.587863 1.114663  
C -0.568668 1.600067 0.551300  
O -0.539980 2.589133 1.113120  
C -2.418323 -0.000092 -0.602778  
O -3.542676 -0.000770 -0.759015

### Structure T<sub>5</sub>

Co 0.601617 -0.083405 -0.240254  
C 0.938623 1.640048 0.323523  
O 1.125601 2.717616 0.613917  
C 0.346811 -1.156364 1.208425  
O 0.140206 -1.863474 2.073277  
C 2.329609 -0.540454 -0.692079  
O 3.359527 -0.852736 -1.047831  
H 0.328839 0.273937 -1.659193  
H 0.200157 -1.060420 -1.279000  
C -1.368133 0.307546 -0.089960  
O -1.762780 1.207140 0.591535  
C -3.779504 -0.289566 -0.615071  
C -2.315952 -0.602420 -0.848337  
H -4.413102 -0.967564 -1.193462  
H -4.043882 -0.391651 0.440811  
H -2.044080 -0.524914 -1.909048  
H -2.066069 -1.634850 -0.569343  
H -4.014687 0.736288 -0.910099

### Structure I<sub>5</sub>

Co 0.594656 -0.106358 -0.193574  
C -1.370973 0.295220 -0.145836  
O -1.765305 1.308626 0.352530  
C -3.776023 -0.357743 -0.637485  
C -2.312149 -0.733642 -0.737093  
H -4.402111 -1.137681 -1.079579  
H -4.081530 -0.223183 0.403469  
H -1.992927 -0.888847 -1.775519  
H -2.097947 -1.686847 -0.234213  
H -3.979896 0.581036 -1.159284  
H 0.294289 0.355868 -1.575309  
H 0.188436 -1.352813 -0.874076

C 0.964724 1.642682 0.263480  
O 1.175486 2.731990 0.478563  
C 0.411896 -0.976720 1.394082  
O 0.239235 -1.572168 2.344825  
C 2.259890 -0.624398 -0.780837  
O 3.219556 -0.999480 -1.253026

#### **Structure T<sub>6</sub>**

Co 0.592889 -0.144854 -0.134379  
C 1.059973 1.576101 0.334159  
O 1.345005 2.636304 0.604629  
C 0.456583 -0.929152 1.488012  
O 0.323842 -1.484359 2.471441  
C 2.140869 -0.645095 -0.964763  
O 3.044754 -1.023788 -1.537874  
H -0.180382 0.309044 -1.354991  
H 0.189597 -1.485026 -0.616157  
C -1.373915 0.369674 -0.316881  
O -1.729397 1.480980 -0.048776  
C -3.798384 -0.336203 -0.525571  
C -2.345604 -0.761920 -0.578327  
H -4.453371 -1.188817 -0.723988  
H -4.056301 0.072886 0.454563  
H -2.077676 -1.195437 -1.550567  
H -2.129877 -1.553774 0.151206  
H -4.010769 0.438647 -1.266955

#### **Structure P'**

Co -0.928627 0.020030 -0.294051  
H 0.650258 0.835198 0.566392  
H -0.576010 0.677108 -1.603087  
C 1.716986 0.450069 0.709600  
O 1.991814 -0.221407 1.659639  
C 4.084317 0.441837 -0.160920  
C 2.655101 0.891143 -0.367387  
H 4.723987 0.788540 -0.975924  
H 4.149386 -0.648280 -0.113799  
H 2.565245 1.984976 -0.440038  
H 2.230962 0.523045 -1.314034  
H 4.485949 0.829907 0.778954  
C -1.475001 -0.816318 1.220231  
O -1.838037 -1.345800 2.156146  
C -0.361285 -1.376008 -1.246441  
O -0.052285 -2.223803 -1.940654  
C -2.003343 1.439346 -0.291287  
O -2.708680 2.327044 -0.392866

**Structure CH<sub>3</sub>CH<sub>2</sub>CHO**

H 1.584155 1.318788 0.000052  
C 0.922950 0.418772 0.000023  
O 1.393887 -0.684752 -0.000016  
C -1.430461 -0.499354 0.000010  
C -0.543703 0.726143 -0.000023  
H -2.487233 -0.221419 -0.000297  
H -1.237859 -1.120224 0.878918  
H -0.732711 1.374035 -0.868946  
H -0.732705 1.374054 0.868890  
H -1.237455 -1.120588 -0.878553

**Structure T<sub>7</sub>**

C 2.476294 0.395055 0.983116  
C 1.798204 0.419401 -0.378105  
H 2.054166 1.138130 1.669001  
H 3.547820 0.618589 0.891687  
H 1.933397 1.395749 -0.853810  
H 2.265100 -0.302946 -1.055424  
H 2.394742 -0.581906 1.473853  
Co -0.164195 -0.020097 -0.037968  
C -1.889331 -0.408992 0.283391  
O -2.986964 -0.654575 0.460345  
C -0.393736 1.724121 -0.365041  
O -0.500140 2.821215 -0.647319  
C 0.382366 -1.686665 -0.403119  
O 0.770612 -2.712515 -0.705205  
H -0.084792 0.359800 2.715239  
H -0.188026 -0.375306 2.600565

**Structure 27'**

Co -0.185263 0.013754 -0.267161  
C 1.690176 0.843702 -0.086030  
C -1.844908 -0.715707 -0.416975  
C -0.716499 1.584566 0.429080  
C 0.536141 -1.316928 0.700248  
C 2.783149 0.060939 -0.784170  
H 1.919493 0.973431 0.976762  
H 1.613277 1.845870 -0.521539  
O -2.881959 -1.174065 -0.488888  
O -0.977749 2.581394 0.914424  
O 1.027811 -2.098924 1.367848  
H 2.920726 -0.941888 -0.366500  
H 3.746590 0.580369 -0.691942  
H 2.586038 -0.057679 -1.855172  
H -0.065393 0.394883 -1.891835  
H 0.248178 -0.373033 -1.836411

**Structure T<sub>8</sub>**

Co -0.188787 0.032631 -0.218470  
C 1.794896 0.935898 -0.372039  
C -1.664865 -0.873658 -0.608713  
C -0.929340 1.572681 0.486021  
C 0.477871 -1.179140 0.952456  
C 2.947340 0.045212 -0.789067  
H 1.820646 1.157961 0.693826  
H 1.820298 1.902602 -0.887286  
O -2.606331 -1.448721 -0.892103  
O -1.406729 2.502903 0.936318  
O 0.915909 -1.931950 1.689372  
H 2.965350 -0.888280 -0.219483  
H 3.905706 0.551229 -0.624343  
H 2.895236 -0.224800 -1.849089  
H -0.083549 0.134890 -1.775174  
H 0.795371 0.501547 -1.320402

**Structure P<sub>side</sub>**

Co -0.488732 -0.301876 -0.152418  
C 1.636449 1.751703 -0.907109  
C 0.552597 -1.747149 -0.230766  
C -2.047403 0.474728 -0.530074  
C -0.251562 0.206753 1.563050  
C 2.885322 1.122933 -0.322223  
H 1.209764 2.510109 -0.243603  
H 1.832371 2.228274 -1.872755  
O 1.148909 -2.710214 -0.338210  
O -3.069631 0.883357 -0.817531  
O -0.108238 0.515117 2.648366  
H 2.693244 0.679696 0.660667  
H 3.680722 1.863368 -0.194476  
H 3.276126 0.330493 -0.968488  
H -0.767569 -0.815227 -1.542903  
H 0.850361 0.994042 -1.101442

**Structure I<sub>4-2</sub>**

Co 0.601797 -0.000102 -0.101016  
C 0.515248 1.599378 0.694267  
O 0.463387 2.562020 1.306479  
C 2.355305 -0.000229 -0.612825  
O 3.434153 -0.000151 -0.968175  
C 0.514866 -1.599486 0.694137  
O 0.462667 -2.562213 1.306212  
C -1.245284 0.000217 -0.408153  
O -1.155709 0.000619 -1.609037

C -2.493912 0.000280 0.405940  
H -2.422982 -0.867964 1.075609  
H -2.423095 0.869313 1.074663  
C -3.770496 -0.000156 -0.412175  
H -3.822481 -0.881249 -1.056910  
H -4.647192 -0.000566 0.239852  
H -3.823141 0.880989 -1.056775

#### **Structure T<sub>4,2</sub>**

Co 0.685992 -0.000434 -0.217203  
C 2.065116 0.003775 1.097155  
O 2.796974 0.006360 1.963138  
C 0.347003 1.602358 -0.938893  
O 0.126745 2.588444 -1.474000  
C 0.348667 -1.607504 -0.929812  
O 0.129781 -2.596904 -1.459355  
H 2.356918 -0.003797 -2.082080  
H 3.060041 -0.006080 -1.813624  
C -1.028633 0.001206 0.572844  
O -0.896523 0.006329 1.757734  
C -2.339208 -0.003350 -0.170320  
H -2.323171 0.861599 -0.845302  
H -2.322998 -0.876919 -0.834154  
C -3.552213 0.002205 0.739267  
H -3.561041 0.887851 1.379628  
H -4.471076 -0.001736 0.147519  
H -3.560688 -0.875171 1.390907

#### **Structure I<sub>5,2</sub>'**

Co -0.933786 0.149731 0.019853  
C -1.002428 -0.794374 1.581723  
O -1.016633 -1.377193 2.558681  
C -1.042827 -0.599511 -1.641503  
O -1.078946 -1.062883 -2.679791  
C -0.460712 1.908419 0.101772  
O -0.195936 3.016130 0.151726  
H -2.453631 0.880368 0.130399  
H -2.603245 0.079379 0.006916  
C 0.958277 -0.513306 -0.038640  
O 1.166371 -1.684585 -0.124523  
C 2.079880 0.506211 0.034242  
H 1.918816 1.225381 -0.779341  
H 1.935060 1.078118 0.960257  
C 3.461905 -0.111507 -0.030859  
H 3.598979 -0.673679 -0.958073  
H 4.229006 0.666037 0.017052  
H 3.623818 -0.805680 0.797593

**Structure T<sub>5-2</sub>**

Co -0.884933 -0.000169 -0.331665  
C -0.660089 -1.749969 -0.629789  
O -0.554020 -2.858576 -0.857023  
C -0.661810 1.750102 -0.628373  
O -0.556939 2.859006 -0.854768  
C -1.395022 -0.001156 1.424924  
O -1.774924 -0.001831 2.495425  
H -2.326094 -0.000760 -0.788870  
H -1.336354 0.000143 -1.745984  
C 1.185767 0.000737 -0.359032  
O 1.785156 0.001835 -1.387697  
C 1.854896 -0.000092 0.999655  
H 1.463982 0.870326 1.545349  
H 1.464637 -0.871692 1.543929  
C 3.368927 0.000537 0.938361  
H 3.739883 0.881333 0.407865  
H 3.796376 -0.000295 1.944544  
H 3.740558 -0.878927 0.406137

**Structure I<sub>5-2</sub>**

Co -0.871807 -0.000226 -0.234718  
C -0.856679 -1.745068 -0.594230  
O -0.894303 -2.841432 -0.886332  
C -0.857999 1.744723 -0.593800  
O -0.896600 2.841187 -0.885388  
C -1.082615 -0.000484 1.577222  
O -1.286284 -0.000788 2.693163  
H -2.388736 -0.000793 -0.279140  
H -1.004404 -0.000092 -1.707643  
C 1.175654 0.000528 -0.435514  
O 1.680044 0.001127 -1.517032  
C 1.990924 0.000311 0.844390  
H 1.663719 0.872262 1.428723  
H 1.664016 -0.872046 1.428278  
C 3.489705 0.000633 0.624480  
H 3.803927 0.880996 0.057975  
H 4.019231 0.000476 1.581083  
H 3.804234 -0.879328 0.057521

**Structure T<sub>6-2</sub>**

Co 0.759406 -0.224730 -0.179857  
C 1.769512 1.200095 -0.582835  
O 2.441376 2.067439 -0.870276  
C 0.417236 -1.919971 -0.583604  
O 0.247549 -3.007641 -0.874406

C 0.734063 -0.197916 1.658818  
O 0.727486 -0.191957 2.794315  
H 2.112028 -0.877441 -0.387715  
H -0.069965 0.157219 -1.380368  
C -1.088613 0.698680 -0.261246  
O -1.166989 1.889572 -0.226289  
C -2.284480 -0.222634 -0.154070  
H -2.265815 -0.873556 -1.039327  
H -2.104884 -0.894911 0.695996  
C -3.604320 0.508614 -0.020539  
H -3.781415 1.161483 -0.879138  
H -4.431603 -0.202666 0.047238  
H -3.618068 1.137064 0.873543

### Structure P''

Co -0.892032 0.120207 0.109418  
C -1.960690 -1.019337 -0.816883  
O -2.700293 -1.706537 -1.342448  
C -0.944553 1.895951 -0.207890  
O -1.051854 3.021586 -0.359767  
C -0.333893 -0.468669 1.733302  
O -0.087068 -0.811021 2.791793  
H -2.119481 0.416183 0.830756  
H 0.374516 -0.123463 -1.042119  
C 1.426343 -0.514394 -0.697697  
O 1.654666 -1.678728 -0.769294  
C 2.395177 0.584655 -0.407068  
H 2.281986 1.330829 -1.207398  
H 2.028158 1.094514 0.495454  
C 3.822197 0.104811 -0.258936  
H 4.165382 -0.396630 -1.167645  
H 4.491380 0.943855 -0.056308  
H 3.911821 -0.611374 0.561741

### Structure 109

Co -0.327206 -0.026165 -0.218529  
C -1.990999 -0.771476 0.055535  
O -2.999603 -1.221965 0.314190  
C -0.868709 1.648619 -0.450607  
O -1.184417 2.724292 -0.645829  
C 0.549496 -1.572579 -0.493206  
O 1.090153 -2.540764 -0.732448  
C 0.119063 0.083503 1.775089  
H -0.370312 0.947042 2.230738  
H -0.139476 -0.818423 2.331618  
C 1.601615 0.289705 1.514184  
H 2.128809 -0.672441 1.493467

H 2.137357 0.941578 2.219947  
C 1.537836 0.816883 0.106483  
O 2.569133 0.373176 -0.706142  
H 2.462239 0.742538 -1.587269  
H 1.445561 1.908902 0.072499  
H -0.321554 0.011408 -1.743739

### Structure 121

Co 0.378679 -0.020164 -0.027374  
C 0.767872 1.738291 0.017374  
O 1.025520 2.841336 0.149595  
C 1.918421 -0.605354 -0.777809  
O 2.886971 -0.975070 -1.248760  
C -1.542672 0.338543 0.294300  
H -1.995955 -0.251249 1.098576  
O -2.035569 1.639907 0.269739  
H -1.964683 2.022997 1.147722  
C -1.610620 -0.306571 -1.046351  
H -2.030123 0.411749 -1.758769  
H -0.552351 -0.462945 -1.485772  
C -2.310546 -1.653149 -1.085644  
H -1.897641 -2.329096 -0.329852  
H -3.378892 -1.532034 -0.882382  
H -2.203263 -2.137563 -2.060129  
C 0.383588 -1.095534 1.396482  
O 0.393369 -1.715522 2.356875

### Structure 122

Co 0.636389 0.000080 0.154874  
H 0.868413 0.001458 1.680035  
C 0.567169 1.522783 -0.817148  
O 0.498406 2.483011 -1.431380  
C 0.566779 -1.523269 -0.816000  
O 0.497867 -2.483969 -1.429486  
C -1.206353 0.000365 0.542674  
O -1.678548 0.001726 1.761560  
H -0.916119 0.002363 2.362537  
C -2.313026 -0.000672 -0.461770  
H -2.128551 0.861384 -1.118558  
H -2.128425 -0.863893 -1.116978  
C -3.737594 -0.000298 0.059800  
H -3.941129 -0.881407 0.673630  
H -3.941183 0.881774 0.672226  
H -4.441982 -0.000990 -0.775643  
C 2.354566 -0.000128 0.594768  
O 3.439431 -0.000210 0.952707

**Structure 14**

Co 0.528967 0.015778 0.100440  
C 1.663123 -1.182346 -0.599135  
O 2.467017 -1.905971 -0.957503  
C -0.278312 -1.087144 1.318560  
O -0.802710 -1.763704 2.063812  
C 0.856701 1.135833 -1.410358  
H 1.774350 1.673328 -1.736826  
O -0.168711 1.193788 -2.023373  
H -3.202480 -0.985782 -1.880167  
C -2.716276 -0.854554 -0.907037  
H -3.020606 -1.689627 -0.266912  
H -1.634443 -0.951152 -1.081852  
C -3.070501 0.484158 -0.287087  
H -2.728010 1.315069 -0.912338  
H -4.151497 0.591001 -0.153225  
H -2.611697 0.607261 0.702397  
C 0.649631 1.479260 1.128302  
O 0.837665 2.371218 1.811760

**Structure I<sub>4,3</sub>**

Co 0.403482 0.013248 -0.046416  
C -1.549578 0.074390 -0.359414  
O -2.154928 0.046261 -1.387214  
H -0.401732 -0.022268 2.181808  
C 0.330482 1.752834 -0.467362  
O 0.316849 2.829717 -0.836790  
C 0.276345 -1.665582 -0.670019  
O 0.220833 -2.688367 -1.164671  
C 2.148683 -0.045487 0.463960  
O 3.237804 -0.081837 0.786797  
C -2.217869 0.207623 1.002132  
H -3.233840 -0.197420 0.922305  
H -2.321317 1.291059 1.159782  
C -1.429461 -0.418145 2.140472  
H -1.365238 -1.505172 2.036210  
H -1.887959 -0.203875 3.109538

**Structure 20**

C -2.060770 -0.265077 -0.409711  
O -3.105827 -0.579723 -0.717468  
H -0.088225 0.314508 -1.576710  
Co -0.266351 0.069098 -0.110639  
C 1.671869 -0.042214 -0.503373  
O 2.516312 0.791143 -0.542916  
C -0.010257 -0.443269 1.625745  
O 0.165178 -0.807783 2.686829

C -0.240135 1.888729 0.034296  
O -0.140369 3.016158 0.044979  
C 1.704413 -1.517952 -0.716428  
H 2.251793 -1.799803 -1.626800  
H 2.234318 -1.966414 0.135943  
C 0.205520 -1.812021 -0.701687  
H -0.208600 -2.028998 -1.685952  
H -0.103988 -2.592474 -0.003675

### Structure 23

Co -0.023651 0.000042 -0.144118  
C -1.664310 0.002547 -0.837449  
O -2.678805 0.004676 -1.359299  
C -0.106322 1.493118 0.881818  
O -0.160613 2.432697 1.524380  
C 1.811300 -0.004028 -0.254321  
H 2.477655 -0.009032 0.624435  
O 2.577067 -0.000927 -1.307869  
C -0.110980 -1.494096 0.879563  
O -0.168734 -2.434858 1.520113  
H 0.023134 0.006223 -1.674778  
H 2.008353 0.003713 -2.094728

### Structure 24

Co 0.000017 -0.366686 -0.268491  
C -0.000026 0.027628 1.711934  
O -0.000110 1.122144 2.184935  
H 0.000030 -0.873089 2.378664  
C 1.751143 -0.695781 -0.257837  
O 2.849347 -0.979303 -0.284751  
C -0.000005 1.400621 -0.774703  
O -0.000023 2.480531 -1.105368  
H 0.000045 -0.775746 -1.736611  
C -1.751099 -0.695830 -0.257890  
O -2.849295 -0.979384 -0.284827  
H 0.000029 -1.822370 -0.001729

### Structure 24'

Co 0.065262 0.002264 0.254951  
C 1.902712 -0.036146 0.432580  
O 3.033085 -0.061048 0.518999  
C -0.000134 1.610982 -0.555282  
O -0.055958 2.604894 -1.107790  
C -1.911582 0.035615 0.059585  
H -2.304595 0.080960 -0.986738  
O -2.653858 0.007789 0.989027  
C -0.063954 -1.595179 -0.568603

O -0.154709 -2.581700 -1.129761  
H -0.169971 0.416696 1.866606  
H -0.198238 -0.409914 1.862979

### Structure 3

Co -0.000681 -0.000591 0.510274  
H 0.999133 0.257936 1.561241  
H -0.727265 0.735896 1.559101  
H -0.278282 -0.997776 1.558944  
C -1.609180 -0.417850 -0.228807  
O -2.646547 -0.686903 -0.598720  
C 1.167457 -1.182950 -0.227980  
O 1.920690 -1.945261 -0.597955  
C 0.443005 1.601299 -0.227099  
O 0.727998 2.634277 -0.597497

### Structure 3'

Co 0.000332 -0.165296 0.443081  
H 0.418631 0.093690 2.028830  
H -0.417254 0.091886 2.029405  
H 0.003012 -1.619175 0.767009  
C -1.586589 -0.667300 -0.215819  
O -2.567059 -1.054427 -0.645956  
C 1.587625 -0.664719 -0.216293  
O 2.568564 -1.050966 -0.646209  
C -0.001639 1.577905 -0.075603  
O -0.002721 2.658052 -0.425603

### Structure 5

Co 0.729596 -0.000072 0.135431  
C 0.563765 1.463602 -0.913285  
O 0.376859 2.385799 -1.559265  
C 0.564736 -1.464271 -0.912785  
O 0.378370 -2.386770 -1.558474  
C -0.479021 -0.000122 1.270842  
O -1.532608 -0.000039 1.966102  
H -2.349829 -0.000149 1.400896  
C 2.495199 0.000600 0.594759  
O 3.576162 0.001155 0.951626  
C -3.170114 0.000903 -0.675890  
H -2.747761 0.924681 -1.063224  
H -2.746845 -0.921469 -1.065554  
C -4.152679 -0.000661 0.218725  
H -4.588488 0.923366 0.589715  
H -4.587743 -0.925945 0.587426

### Structure 7

Co 0.007358 0.028822 0.096290  
C -0.424635 -1.696921 0.521822  
O -0.690038 -2.755373 0.833448  
C 1.594272 -0.260958 -0.685424  
O 2.542694 -0.449323 -1.289371  
C 0.448841 1.795819 0.495755  
H 0.682271 2.738099 -0.040719  
O 0.425495 1.701557 1.691391  
C -1.529061 0.518129 -0.686211  
O -2.455332 0.796551 -1.289811

#### **Structure 71**

Co 0.021586 0.113770 -0.169268  
H 0.085139 1.093357 -1.286281  
C -1.363444 1.165418 0.182009  
O -2.217501 1.894883 0.372446  
C 1.712188 0.751262 0.034760  
O 2.743235 1.218768 0.108879  
C -0.878531 -1.209157 -1.558255  
H -1.589775 -1.848778 -1.008858  
H -1.304281 -0.592357 -2.365504  
O 0.353714 -1.409974 -1.484696  
C -0.080402 -1.013219 1.289867  
O -0.143543 -1.689908 2.195946

#### **Structure 99**

Co -0.916240 -0.060069 -0.035128  
H -1.587234 -0.083387 -1.355074  
H -2.311892 -0.196007 0.556926  
C -1.278206 1.657448 -0.280113  
O -1.542617 2.742401 -0.488686  
C -0.114679 -0.035785 1.607741  
O 0.422315 -0.010745 2.604291  
C 0.926864 0.062922 -0.919509  
H 0.785187 -0.102981 -1.993830  
O 1.842871 -0.909887 -0.380120  
C 1.892629 1.210338 -0.597677  
H 2.218604 1.807659 -1.452670  
H 1.588326 1.888117 0.205292  
C 2.839508 0.094790 -0.153709  
H 3.164451 0.114926 0.893457  
H 3.715926 -0.055292 -0.796224  
C -0.965090 -1.817644 -0.353114  
O -1.052698 -2.919716 -0.601879

#### **Structure T<sub>9</sub>**

Co -0.000505 -0.037018 0.507912

H 0.715134 0.455372 1.703061  
H -0.707861 0.463803 1.704559  
H -0.007836 -1.224256 1.383522  
C -1.480194 -0.783591 -0.237703  
O -2.426405 -1.281747 -0.617109  
C 1.470080 -0.801241 -0.237689  
O 2.412418 -1.306996 -0.616672  
C 0.009603 1.640546 -0.197787  
O 0.016145 2.710027 -0.574431

#### **Structure T<sub>10</sub>**

Co -0.278282 0.023145 -0.123924  
C 1.698161 0.057790 -0.294923  
O 2.511725 0.889705 -0.057988  
H -0.144966 -0.052234 -1.603790  
C -0.303664 1.840317 -0.068322  
O -0.236566 2.972454 -0.079944  
C -0.024893 -0.585980 1.588610  
O 0.129975 -0.953464 2.653465  
C -2.089249 -0.304787 -0.309945  
O -3.177723 -0.559653 -0.502628  
C 1.832457 -1.332968 -0.829194  
H 2.193416 -1.967036 -0.007699  
H 2.561246 -1.402673 -1.647693  
C 0.376758 -1.631016 -1.182280  
H -0.060799 -2.489781 -0.670246  
H 0.208028 -1.765653 -2.251544

#### **Structure T<sub>11</sub>**

Co 0.643497 0.000238 0.193979  
H 0.654698 0.000927 1.883182  
C 0.521680 1.612200 -0.590792  
O 0.393642 2.611169 -1.127492  
C 0.521834 -1.611571 -0.591022  
O 0.393563 -2.610369 -1.128006  
C -1.260882 -0.000157 0.437026  
O -1.567322 -0.000294 1.657452  
H -0.402893 -0.000052 1.994315  
C -2.355828 -0.000350 -0.574452  
H -2.176715 0.864591 -1.229714  
H -2.176705 -0.865613 -1.229291  
C -3.764480 -0.000266 -0.014189  
H -3.942375 -0.880787 0.608303  
H -3.942317 0.880301 0.608252  
H -4.497687 -0.000259 -0.824463  
C 2.456074 -0.000094 0.319231  
O 3.580014 -0.001019 0.477693

**Structure T<sub>12</sub>**

Co 0.400581 -0.034166 -0.027307  
C 0.812722 1.723620 0.024881  
O 1.099522 2.815627 0.159881  
C 1.923598 -0.632470 -0.839010  
O 2.876667 -0.999486 -1.339642  
C -1.450391 0.451829 0.239421  
H -1.961266 -0.500216 1.085886  
O -2.032677 1.574520 0.558675  
H -2.354762 0.379242 1.165755  
C -1.620205 -0.218122 -1.116664  
H -1.917426 0.582171 -1.801133  
H -0.622467 -0.585410 -1.509906  
C -2.579605 -1.393812 -1.140636  
H -2.253228 -2.181915 -0.453399  
H -3.583481 -1.072889 -0.843914  
H -2.646130 -1.831445 -2.139986  
C 0.432154 -1.114488 1.395666  
O 0.483167 -1.736461 2.352592

**Structure T<sub>13</sub>**

Co -0.321601 -0.017203 -0.206956  
C -2.045133 -0.608237 0.095239  
O -3.082352 -0.966975 0.379804  
C -0.713120 1.695047 -0.484945  
O -0.966734 2.778692 -0.724275  
C 0.406571 -1.630456 -0.551393  
O 0.839497 -2.633463 -0.855495  
C 0.118421 0.075958 1.788556  
H -0.274350 0.993592 2.232169  
H -0.223144 -0.779978 2.371976  
C 1.615697 0.120283 1.534956  
H 2.052497 -0.888619 1.528836  
H 2.235995 0.733618 2.205123  
C 1.651732 0.534140 0.086192  
O 2.611909 0.297726 -0.758756  
H 2.264240 1.572307 -0.370903  
H 1.551000 1.895389 0.203563  
H -0.346577 0.009924 -1.724814

**Structure T<sub>14</sub>**

Co 0.357182 -0.039240 0.010483  
C 1.091993 1.609495 0.095734  
O 1.575704 2.627230 0.247221  
C 1.759875 -0.829821 -0.855304  
O 2.652933 -1.308220 -1.372413

C -1.334256 0.725652 0.556125  
H -1.990903 0.092742 1.187776  
O -1.681851 1.969516 0.419500  
H -1.871427 1.126332 -0.610622  
C -1.674985 -0.099400 -1.198055  
H -1.951672 0.596447 -2.015712  
H -0.689235 -0.479534 -1.560918  
C -2.692929 -1.191982 -0.985202  
H -2.374411 -1.872967 -0.189911  
H -3.663971 -0.777862 -0.696838  
H -2.840578 -1.793158 -1.888236  
C 0.211618 -1.261092 1.314308  
O 0.149513 -1.982228 2.196414

#### Structure T<sub>15</sub>

Co -0.597956 0.000041 -0.162785  
C -0.391069 1.533777 0.748032  
O -0.220880 2.502285 1.332844  
C -0.390669 -1.533353 0.748455  
O -0.220268 -2.501720 1.333443  
C 0.579115 -0.000103 -1.418529  
O 1.636216 -0.000291 -1.997823  
H 2.521354 -0.000462 -1.147409  
C -2.389450 -0.000300 -0.416695  
O -3.508279 -0.000539 -0.631031  
C 2.513898 -0.000056 0.947542  
H 2.161441 0.920650 1.400196  
H 2.162039 -0.920991 1.400212  
C 3.405330 0.000211 -0.088483  
H 3.921004 0.926475 -0.339712  
H 3.921737 -0.925713 -0.339489

#### Structure T<sub>16</sub>

Co -0.163481 0.026681 -0.305293  
H -0.478722 0.260919 -1.916951  
C -0.213065 1.631850 0.522674  
O -0.203117 2.623705 1.081844  
C 0.439676 -1.408534 0.584698  
O 0.872410 -2.293094 1.157940  
C 1.550451 0.352461 -0.952742  
H 0.613674 0.408310 -1.858142  
O 2.626917 0.021490 -0.298519  
H 3.415325 0.249831 -0.815478  
C -1.955394 -0.407305 -0.223207  
O -3.054496 -0.683385 -0.285646

#### Structure T<sub>17</sub>

Co 0.034572 0.111456 -0.194294  
H 0.114342 1.136242 -1.259538  
C -1.185792 1.307487 0.297473  
O -1.954703 2.102303 0.558789  
C 1.781657 0.601932 -0.003215  
O 2.849753 0.975827 0.067277  
C -1.288428 -0.913178 -1.396493  
H -1.872213 -1.603921 -0.758617  
H -0.507940 -0.845367 -2.416963  
O 0.026395 -1.375194 -1.561447  
C -0.089594 -1.108287 1.202957  
O -0.168282 -1.830934 2.069972

#### Structure T<sub>18</sub>

Co -0.014366 -0.000089 0.144150  
C -1.786566 -0.001380 0.558647  
O -2.868197 -0.002047 0.900168  
C -0.028055 -1.603012 -0.678891  
O -0.011471 -2.595398 -1.238366  
C 1.873617 0.001827 0.113709  
H 2.576738 0.002589 -0.739670  
O 2.405724 0.002237 1.247284  
C -0.031053 1.602772 -0.678876  
O -0.016497 2.594964 -1.238765  
H 0.246390 -0.000320 1.812506  
H 1.320635 0.000848 1.785014

#### Structure T<sub>19</sub>

Co 0.000039 -0.102513 -0.493577  
C -0.000097 -1.041067 1.311878  
O -0.000288 -0.454242 2.346153  
H -0.000006 -2.159180 1.285262  
C 1.756114 -0.448023 -0.482530  
O 2.866201 -0.684392 -0.529710  
C 0.000037 1.654872 0.063621  
O 0.000080 2.746761 0.360900  
H 0.000106 0.279434 -1.961983  
C -1.756051 -0.447974 -0.482673  
O -2.866147 -0.684275 -0.529957  
H 0.000050 -1.050065 -1.637571

#### Structure T<sub>20</sub>

Co -0.797114 0.375935 -0.144938  
H -1.049806 0.565336 -1.593513  
H -2.131914 1.083453 0.118936  
C -0.154525 2.001147 -0.415741  
O 0.217845 3.051517 -0.648219

C -0.447600 0.137168 1.635278  
O -0.205770 -0.008876 2.732370  
C 0.901862 -0.711891 -0.605204  
H 1.034740 -0.674194 -1.704636  
O 1.017873 -1.869084 -0.019218  
C 2.419704 0.225695 -0.197853  
H 2.556515 0.894552 -1.042282  
H 2.357316 0.691779 0.781954  
C 2.912953 -1.076444 -0.267993  
H 3.180261 -1.653445 0.609600  
H 3.185404 -1.515867 -1.223885  
C -1.748455 -1.092105 -0.511324  
O -2.394207 -1.978967 -0.796913

The following is the Cartesian coordinates of stereoisomers and conformers of **I<sub>3</sub>** found by our method:

**Structure I<sub>3</sub>-1**

Co -0.010641 0.057940 -0.240539  
C 0.551709 -1.681513 -0.888559  
O 0.942460 -2.904134 -1.360201  
C 0.193592 -0.564544 1.585984  
O 0.325477 -0.969620 2.885682  
C 1.838015 0.661006 -0.257061  
O 3.128410 1.108774 -0.266603  
C -1.853291 -0.554659 -0.240461  
O -3.159550 -0.957019 -0.244628  
C -0.600322 1.870660 0.426178  
H -1.469038 1.760035 1.110665  
H 0.225893 2.335815 1.007658  
C -0.983883 2.782289 -0.736193  
H -1.239757 3.797141 -0.358501  
H -1.866583 2.372992 -1.274554  
H -0.132509 2.866198 -1.444056

**Structure I<sub>3</sub>-2**

Co 0.126122 -0.023455 0.426297  
C -1.369498 -1.267331 0.406419  
O -2.451584 -2.101763 0.407267  
C 1.349038 -1.508028 0.169338  
O 2.234935 -2.536002 0.004906  
C 0.009300 0.203578 -1.499576  
O -0.078251 0.384253 -2.850724  
C 1.653001 1.174691 0.461169  
O 2.716414 2.032849 0.497241  
C -1.138825 1.560375 0.728758  
H -1.261629 1.675768 1.826721  
H -0.645349 2.483055 0.353567

C -2.533550 1.476132 0.081309  
H -3.067020 2.440222 0.226697  
H -3.160046 0.675545 0.540732  
H -2.460156 1.287499 -1.011739

### Structure I<sub>3</sub>-3

Co 0.139975 0.053605 0.440726  
C 1.603483 -1.218786 0.455637  
O 2.622809 -2.129137 0.501279  
C -0.089766 -0.254585 -1.460453  
O -0.290270 -0.517978 -2.784211  
C 1.415468 1.457250 0.050055  
O 2.325995 2.444356 -0.200893  
C -1.282488 1.372783 0.436870  
O -2.302630 2.281680 0.460960  
C -1.203580 -1.432223 0.889315  
H -0.685938 -2.415707 0.879830  
H -1.536494 -1.253344 1.934592  
C -2.452309 -1.537672 -0.009855  
H -2.194933 -1.783674 -1.069311  
H -3.043233 -0.596348 0.001922  
H -3.110790 -2.350232 0.366864

### Structure I<sub>3</sub>-4

Co 0.006666 0.049784 -0.239230  
C -1.896596 0.438436 -0.253531  
O -3.227929 0.745366 -0.272479  
C -0.120664 -0.558199 1.599989  
O -0.200276 -0.949819 2.907397  
C 1.908763 -0.344410 -0.247313  
O 3.252526 -0.590793 -0.261059  
C -0.361266 -1.746008 -0.875811  
O -0.618302 -3.005577 -1.338392  
C 0.391299 1.920432 0.409123  
H -0.459690 2.291956 1.020265  
H 1.289179 1.914545 1.064543  
C 0.626009 2.873710 -0.759760  
H 0.831507 3.895606 -0.374072  
H -0.274139 2.915714 -1.410505  
H 1.499740 2.540846 -1.360938

### Structure I<sub>3</sub>-5

Co 0.078595 -0.055463 -0.356877  
C 1.222242 1.503138 -0.482084  
O 2.032969 2.599045 -0.587301  
C 1.647389 -1.197215 -0.422518  
O 2.749841 -2.002671 -0.483175

C -1.444312 1.152438 -0.293736  
O -2.519176 1.997341 -0.266762  
C 0.213120 0.029083 1.577613  
O 0.310673 0.091026 2.940632  
C -1.079146 -1.737409 -0.253038  
H -0.880924 -2.274197 0.697638  
H -0.751106 -2.407067 -1.076643  
C -2.588851 -1.545201 -0.386200  
H -2.828497 -1.020371 -1.334745  
H -2.987748 -0.970564 0.477734  
H -3.090905 -2.537219 -0.395678

The following is the Cartesian coordinates of stereoisomers and conformers of **I<sub>5</sub>** found by our method:

**Structure I<sub>5</sub>-1**

Co 0.502512 -0.001641 0.475214  
C 0.497235 1.188280 -0.826443  
O 0.471042 1.997158 -1.709410  
C 0.978461 -1.244769 -0.677954  
O 1.295650 -2.103408 -1.451776  
C 2.199172 0.350028 0.789307  
O 3.351565 0.579977 1.018334  
H 0.073857 1.124435 1.537014  
H 0.526199 -1.085274 1.635151  
C -1.418676 -0.418994 0.158026  
O -1.787403 -1.583035 0.222194  
C -2.422742 0.668149 -0.145288  
H -2.053198 1.633973 0.260930  
H -2.517333 0.773148 -1.248341  
C -3.799512 0.379954 0.458013  
H -3.727336 0.245361 1.558886  
H -4.483993 1.229697 0.248904  
H -4.236464 -0.538471 0.007965

**Structure I<sub>5</sub>-2**

Co 0.638098 0.398994 -0.526145  
C -0.728199 1.483773 -0.789208  
O -1.654123 2.220807 -0.973152  
C 2.023763 -0.661439 -0.270663  
O 2.970538 -1.375423 -0.095294  
C 0.789050 0.948918 1.141741  
O 0.898914 1.322402 2.275319  
H 1.628087 1.572247 -0.984812  
H 0.533625 -0.078334 -2.051048  
C -0.596159 -1.087380 0.002435  
O -0.448982 -2.188498 -0.509123  
C -1.727846 -0.893355 0.977263

H -1.646781 -1.651768 1.787871  
H -1.663937 0.112446 1.433307  
C -3.082278 -1.023566 0.285589  
H -3.198403 -2.035931 -0.159022  
H -3.894079 -0.868990 1.027759  
H -3.187908 -0.258516 -0.513085
